# Supplementary material for: Literature review and protocol for a prospective multicentre cohort study on multimodal prediction of seizure recurrence after unprovoked first seizure
Source: PubMed Central journal article supplement — BMJ Open. 2024 Apr 5;14(4):e086153. doi: 10.1136/bmjopen-2024-086153 (PMC11002401; doi:10.1136/bmjopen-2024-086153), 2024-04-05
Supplement: bmjopen-2024-086153.draft_revisions.pdf [file bmjopen-2024-086153.draft_revisions.pdf]

# BMJ Open

BMJ Open is committed to open peer review. As part of this commitment we make the peer review history of every article we publish publicly available.

When an article is published we post the peer reviewers' comments and the authors' responses online. We also post the versions of the paper that were used during peer review. These are the versions that the peer review comments apply to.

The versions of the paper that follow are the versions that were submitted during the peer review process. They are not the versions of record or the final published versions. They should not be cited or distributed as the published version of this manuscript.

BMJ Open is an open access journal and the full, final, typeset and author-corrected version of record of the manuscript is available on our site with no access controls, subscription charges or pay-per-view fees (<http://bmjopen.bmj.com>).

If you have any questions on BMJ Open's open peer review process please email [info.bmjopen@bmj.com](mailto:info.bmjopen@bmj.com)

# BMJ Open

## Literature review and protocol for a prospective multi-centre cohort study on multimodal prediction of seizure recurrence after unprovoked first seizure

|                               |                                                                                                                                                                                                                                                                                                                                                                                                                                                                                                                                                                                                                                                                                                                                                                                                                                                                                                                                                                                                                                                                                                         |
|-------------------------------|---------------------------------------------------------------------------------------------------------------------------------------------------------------------------------------------------------------------------------------------------------------------------------------------------------------------------------------------------------------------------------------------------------------------------------------------------------------------------------------------------------------------------------------------------------------------------------------------------------------------------------------------------------------------------------------------------------------------------------------------------------------------------------------------------------------------------------------------------------------------------------------------------------------------------------------------------------------------------------------------------------------------------------------------------------------------------------------------------------|
| Journal:                      | <i>BMJ Open</i>                                                                                                                                                                                                                                                                                                                                                                                                                                                                                                                                                                                                                                                                                                                                                                                                                                                                                                                                                                                                                                                                                         |
| Manuscript ID                 | bmjopen-2024-086153                                                                                                                                                                                                                                                                                                                                                                                                                                                                                                                                                                                                                                                                                                                                                                                                                                                                                                                                                                                                                                                                                     |
| Article Type:                 | Protocol                                                                                                                                                                                                                                                                                                                                                                                                                                                                                                                                                                                                                                                                                                                                                                                                                                                                                                                                                                                                                                                                                                |
| Date Submitted by the Author: | 06-Mar-2024                                                                                                                                                                                                                                                                                                                                                                                                                                                                                                                                                                                                                                                                                                                                                                                                                                                                                                                                                                                                                                                                                             |
| Complete List of Authors:     | Beattie, Brooke; Queen's University, Centre for Neuroscience Studies<br>Batista García-Ramó, Karla; Queen's University, Centre for Neuroscience Studies/Department of Medicine<br>Biggs, Krista; Nova Scotia Health Authority<br>Boissé Lomax, Lysa; Queen's University, Centre for Neuroscience Studies/Department of Medicine<br>Brien, Donald; Queen's University, Centre for Neuroscience Studies<br>Gallivan, Jason; Queen's University, Centre for Neuroscience Studies/Department of Psychology<br>Ikeda, Kristin; Dalhousie University, Department of Medicine/Neurology<br>Schmidt, Matthias; Dalhousie University, Department of Diagnostic Radiology<br>Shukla, Garima; Queen's University, Centre for Neuroscience Studies/Department of Medicine<br>Whatley, Benjamin; Dalhousie University, Department of Medicine/Neurology<br>Woodroffe, Stephanie; Dalhousie University, Department of Medicine/Neurology<br>Omisade, Antonina; Nova Scotia Health Authority<br>Winston, Gavin; Epilepsy Society, MRI Unit; Queen's University, Centre for Neuroscience Studies/Department of Medicine |
| Keywords:                     | Epilepsy < NEUROLOGY, Magnetic Resonance Imaging, Electroencephalography                                                                                                                                                                                                                                                                                                                                                                                                                                                                                                                                                                                                                                                                                                                                                                                                                                                                                                                                                                                                                                |
|                               |                                                                                                                                                                                                                                                                                                                                                                                                                                                                                                                                                                                                                                                                                                                                                                                                                                                                                                                                                                                                                                                                                                         |

SCHOLARONE™  
Manuscripts

1  
2 **Title:** Literature review and protocol for a prospective multi-centre cohort study on multimodal  
3 prediction of seizure recurrence after unprovoked first seizure  
4  
5  
6  
7

8 **Authors:** Brooke Beattie<sup>1</sup>, Karla Batista García-Ramó<sup>1,2</sup>, Krista Biggs<sup>3</sup>, Lysa Boissé Lomax<sup>1,2</sup>, Donald  
9 Brien<sup>1</sup>, Jason Gallivan<sup>1,4</sup>, Kristin Ikeda<sup>5</sup>, Matthias Schmidt<sup>6</sup>, Garima Shukla<sup>1,2</sup>, Benjamin Whatley<sup>5</sup>,  
10 Stephanie Woodroffe<sup>5</sup>, Antonina Omisade<sup>3\*</sup>, Gavin P Winston<sup>1,2\*</sup>  
11  
12  
13

14 \* Joint senior authors  
15  
16  
17  
18

19 <sup>1</sup>Centre for Neuroscience Studies, Queen's University, Kingston ON, Canada  
20

21 <sup>2</sup>Department of Medicine, Queen's University, Kingston ON, Canada  
22

23 <sup>3</sup>Nova Scotia Health Authority, Halifax NS, Canada  
24

25 <sup>4</sup>Department of Psychology, Queen's University, Kingston ON, Canada  
26  
27

28 <sup>5</sup>Department of Medicine/Neurology, Dalhousie University, Halifax NS, Canada  
29  
30

31 <sup>6</sup>Department of Diagnostic Radiology, Dalhousie University, Halifax NS, Canada  
32  
33  
34

35 **Corresponding Author**  
36

37 Dr Gavin P Winston  
38

39 Queen's University  
40

41 76 Stuart Street  
42

43 Kingston, Ontario  
44

45 K7L 2V7  
46

47 [gavin.winston@queensu.ca](mailto:gavin.winston@queensu.ca)  
48  
49  
50  
51  
52  
53  
54  
55  
56  
57  
58  
59  
60

## **Abstract:**

**Introduction:** Epilepsy is a common neurological disorder characterised by recurrent seizures. Almost half of patients that have an unprovoked first seizure (UFS) have additional seizures and develop epilepsy. No current predictive models exist to determine who has a higher risk of recurrence to guide treatment. Emerging evidence suggests alterations in cognition, mood, and brain connectivity exist in the population with UFS. Baseline evaluations of these factors following an UFS will enable the development of the first multimodal biomarker-based predictive model of seizure recurrence in adults with UFS.

**Methods and analysis:** 200 patients and 75 matched healthy controls (aged 18-65) from the Kingston and Halifax First Seizure Clinics will undergo neuropsychological assessments, structural and functional magnetic resonance imaging, and electroencephalography. Seizure recurrence will be assessed prospectively. Regular follow-ups will occur at 3, 6, 9, and 12 months to monitor recurrence. Comparisons will be made between patients with UFS and healthy control groups, as well as between patients with and without seizure recurrence at follow-up. A multimodal machine learning model will be trained to predict seizure recurrence at 12 months.

**Ethics and dissemination:** This study was approved by the Health Sciences and Affiliated Teaching Hospitals Research Ethics Board at Queen's University (DMED-2681-22) and the Nova Scotia Research Ethics Board (1028519). It is supported by the Canadian Institutes of Health Research (PJT-183906). Findings will be presented at national and international conferences, published in peer-reviewed journals and presented to the public via patient support organization newsletters and talks.

**Registration details:** ClinicalTrials.gov Identifier: NCT05724719

**Keywords:** Epilepsy, magnetic resonance imaging, electroencephalography, cognition

**Strengths and limitations of this study:** (maximum of 5 bullet points relating to the methods)

1. This study will provide the first multi-modal biomarker-based predictive model of seizure recurrence after unprovoked first seizure that integrates behavioral, EEG and MRI data.
2. Early identification of individuals who would benefit from anti-seizure medication after an UFS may improve quality of life and reduce healthcare utilisation by preventing seizures.
3. The multi-center nature of this study allows for preliminary assessment of the model in two demographically and culturally distinct groups of Canadian patients, thus expanding the applicability and impact of this work to a wide range of patients with UFS.
4. The study is only recruiting from the Canadian population which may limit generalisability.
5. Since recruitment is based on occurrence of clinical events and is contingent on factors impacting first seizure clinic capacity (e.g., changes in staffing or wait lists), delays to completion may occur.

## **Introduction:**

### **Background and Rationale**

#### ***Epilepsy, First Seizure and Recurrence Risk***

Epilepsy is a disorder of the brain characterized by an “enduring predisposition to generate epileptic seizures” [1], manifesting as at least two unprovoked seizures >24 hours apart or one unprovoked seizure with a >60% risk of recurrence [2]. The prevalence of active epilepsy is around 1% but up to 10% of the population will experience a single seizure at some point in their lives [3, 4]. Seizures may be provoked by toxic/metabolic disturbances, trauma, or stroke but most cases are unprovoked first seizure (UFS).

Following an UFS and in the absence of treatment, 40-50% of these individuals will have further seizures within 2 years and thus be diagnosed with epilepsy (Figure 1) [5, 6]. Most recurrence (~40%) occurs in the first year. Evidence-based guidelines identify four clinical factors that increase the risk of recurrence following UFS [7] including epileptiform abnormalities on EEG, a remote symptomatic cause (e.g. brain tumor on neuroimaging), abnormal neurological examination and a first seizure during sleep.

Anti-seizure medications may be offered to individuals with identified risk factors. However, most patients with UFS have normal examination, EEG and brain imaging at presentation [8, 9] (Figure 1).

#### ***Current Challenges in Clinical Decision Making***

In patients with UFS and no adverse prognostic factors, typical clinical practice is to defer treatment until after a second event. This approach is associated with morbidity through increased risk of accidents (e.g., falls, motor vehicle accidents), carries implications for driving privileges, and can also have profound psychosocial impact (e.g., impact on employment, education, and mental health). On the other hand, while early treatment after an UFS can reduce the risk of seizure recurrence by around 35% in the short term [7], it is associated with medication side effects in up to 31% of patients [7]. Hence, offering treatment to patients at low risk of recurrence may mean unnecessary treatment with its associated adverse effects. The ability to determine individual recurrence risk after UFS would help determine whether early treatment is warranted, and whether the potential benefits outweigh the risks [10].

#### ***Epilepsy as a Network Disorder and Limitations in the Literature***

Epilepsy is increasingly conceptualised as a network disorder [11] with seizures sustained by microstructural or biochemical disturbances in normal-appearing brain tissue outside of the presumed seizure focus [12]. Widespread changes in structural and functional brain connectivity, and behavioral manifestations of these changes including cognitive dysfunction [13, 14] and mood disturbance, may yield biomarkers for clinical outcomes.

1  
2 Most research to date has focused on individuals with chronic or newly diagnosed epilepsy (NDE)  
3 (Figure 1), but there is increasing evidence that these changes are detectable prior to the time of formal  
4 diagnosis. Despite this, the population with UFS remains significantly underexplored.  
5

6  
7 Studying patients following UFS and before medication is commenced removes the confounding factor  
8 of anti-seizure medication use on cognition and brain networks present in most studies [15]. Furthermore,  
9 baseline evaluation of multiple factors indicative of neurological network dysfunction will enable the  
10 development of the first multimodal approach that can be applied to prediction of seizure recurrence at  
11 the earliest stages of epilepsy. We will incorporate the following 3 domains to predict seizure recurrence:  
12  
13  
14  
15

### 16 17 ***Domain 1 – Neuropsychological Comorbidity - Cognitive Dysfunction***

18  
19 Cognitive dysfunction is evident at all stages of epilepsy, relates to seizure frequency and severity, and  
20 may predict clinical course [13, 14]. Up to 80% of individuals with chronic epilepsy have cognitive  
21 impairment [16] and approximately 40% of treatment-naive patients with new-onset epilepsy have  
22 cognitive dysfunction in at least two domains [17].  
23  
24  
25

26 Cognitive dysfunction may already be present following a first seizure. A recently published study from  
27 our Halifax First Seizure Clinic, reported cognitive dysfunction in at least one cognitive domain in 56%  
28 of patients with NDE and UFS [18]. Within the UFS subgroup, prevalence of cognitive dysfunction in at  
29 least one domain was 41.2%. Individuals with UFS who were subsequently diagnosed with epilepsy were  
30 significantly more likely to demonstrate cognitive dysfunction at presentation than those who did not.  
31  
32  
33  
34  
35

### 36 37 ***Domain 2 – Psychiatric Comorbidity – Depression and Anxiety***

38 Depression and anxiety are common psychiatric co-morbidities of epilepsy, with prevalence ranging  
39 from 40 to 69% and from 31 to 65% respectively depending on the setting and method of evaluation [19,  
40 20]. Although mood and anxiety disorders are often considered a consequence of epilepsy, there is  
41 evidence of bi-directional relationship between these psychiatric conditions and seizure control [21].  
42  
43  
44

45 Patients presenting to the Halifax First Seizure Clinic have a significantly higher prevalence of both  
46 depression and anxiety compared to controls [22]. Depression and a history of suicide attempts each  
47 significantly increases the risk of UFS [23]. Individuals with UFS who are later diagnosed with epilepsy  
48 had an increased rate of depression compared to controls, while those without further seizures did not  
49 [19]. Anxiety is highly prevalent in UFS and associated with an increased risk of seizure recurrence [24].  
50  
51  
52  
53  
54  
55  
56  
57  
58  
59  
60

### ***Domain 3 – Alterations in Brain Structure and Connectivity***

Subtle brain network disturbances associated with seizures can also be explored using anatomical scans and measures of structural and functional connectivity derived from MRI and EEG.

#### **Anatomical Changes**

In patients with epilepsy, multicentre studies reveal widespread altered subcortical volumes and cortical thinning [25]. Thalamic atrophy has been documented in patients scanned within a week of first seizure [26], and hippocampal atrophy has been observed in newly diagnosed focal epilepsy [27]. The integrity of the thalamus and thalamocortical connectivity are key in both focal [28] and generalized epilepsy [29], so may yield early biomarkers of epilepsy. Measures of hippocampal volume and diffusion parameters can distinguish participants with and without seizure recurrence in early disease [30].

#### **Structural Connectivity**

Structural integrity is primarily studied via diffusion-weighted imaging. Maps of structural connectivity can be analysed with graph theory to assess changes in brain networks [31, 32]. Network metrics such as characteristic path length, small-worldness and global efficiency differ between subjects with focal epilepsy and controls [33]. A reduction in network efficiency and bilateral alterations in network connectivity are also observed in patients with newly diagnosed focal epilepsy [34]. However, no studies explore structural connectivity in relation to seizure recurrence in the UFS population.

#### **Functional Connectivity - MRI**

Resting-state functional MRI (rsfMRI) combines high spatial and temporal resolution to provide an index of functional brain connectivity. In newly diagnosed focal epilepsy, altered functional connectivity is observed within the frontoparietal attentional network [35]. Alterations in fractional amplitude of low frequency fluctuations (fALFF) can differentiate patients with new-onset epilepsy from those with first seizure [36]. No studies specifically address seizure recurrence after UFS.

#### **Functional Connectivity - EEG**

Electroencephalography (EEG) provides a complementary means to assess functional connectivity with exceptional temporal resolution. A decision tree-based machine learning classifier applied to network metrics from baseline EEG classified children referred with suspected epilepsy as having epilepsy or not with much greater sensitivity (96%) and specificity (95%) than the presence of interictal discharges [37].



Multiple papers have found evidence to support the presence of different network connectivity patterns after the UFS in those later diagnosed with epilepsy versus controls, including decreased alpha and beta band connectivity [38] and increased theta band connectivity [39]. Applying machine learning to combined functional connectivity and frequency-based features can help diagnose epilepsy [40], and machine learning applied to combined EEG and rsfMRI data demonstrates greater accuracy in predicting seizure recurrence than the clinical impression alone [41]. EEG features including phase lag index, coherence, and synchronization likelihood were the most discriminatory.

## Summary of Studies

There is ample evidence that cognitive dysfunction, mood disturbance, anatomical, structural and functional brain network disruptions are present at the early stages of epilepsy and may be predictive of clinical course. Although there has been limited research examining these factors and their relation to seizure recurrence in the UFS population, preliminary data from the literature and from our research strongly suggest prognostic value of these variables and their utility in a multimodal prediction approach.

## *Aims of this Study*

Our goal is to examine the baseline behavioral and neuroanatomical characteristics of adult patients with UFS and to develop the first multimodal biomarker-based predictive model of seizure recurrence in this population.

We aim:

1. To determine the prevalence and nature of cognitive dysfunction and mood disturbance in adults with UFS, and to determine how these factors differ between those with (UFS-r) and without (UFS-nr) seizure recurrence.
2. To determine changes in structural and functional brain networks (using MRI and EEG) following UFS compared to controls, and in patients with UFS-r and UFS-nr.
3. To develop a multimodal predictive model that combines clinical information with the identified significant biomarkers (from aims 1-2) to predict 12-month risk of seizure recurrence after UFS.

## **Methods and analysis:**

### **Patient Recruitment**

#### ***Research Centres***

We will recruit patients with UFS from two Canadian epilepsy centers that have clinics specifically dedicated to evaluation and treatment of UFS and newly diagnosed epilepsy.

1  
2 The Halifax First Seizure Clinic (HFSC) is part of a comprehensive, academically driven program  
3 providing clinical and counseling services to adult patients (ages 18+) from across Atlantic Canada  
4 (population 2.3 million). Between July and December 2021, HFSC received 654 referrals, with 244  
5 (37%) classified as UFS. Recruitment estimates for this site based on two recent studies are  
6 approximately 40 participants per year with a full-time research coordinator.  
7  
8

9  
10 The Kingston First Seizure Clinic was established as part of the comprehensive services provided through  
11 the provincial government designated District Epilepsy Centre in Kingston and has a catchment area  
12 comprising the whole of South-Eastern Ontario (population 500,000). The clinic assesses over 120  
13 patients per year and is targeted specifically at those with first seizure, with patients with new-onset  
14 epilepsy seen in other clinics.  
15  
16  
17  
18

### 19 20 **Inclusion & Exclusion Criteria**

21  
22 This study will include adult patients with UFS between the ages of 18-65 years. Individuals over the  
23 age of 65 will not be included to reduce the probability of including individuals with early dementia. We  
24 will also exclude individuals who, upon assessment during their first clinic appointment, are determined  
25 to have non-epileptic events, prior seizure events or diagnosis of epilepsy (e.g. based on abnormal CT or  
26 EEG), provoked seizure (e.g. medication, substance misuse, metabolic), acute symptomatic seizures, an  
27 existing prescription for anti-seizure drugs, significant CNS comorbidity that may affect cognition and  
28 brain networks (e.g. progressive neurological disorder, MS), previous neurosurgery, or contraindication  
29 to MRI. We will also include a sample of age, sex, and education-matched healthy controls with the same  
30 exclusion criteria.  
31  
32  
33  
34  
35  
36  
37  
38

### 39 **Sample Size Calculation**

40  
41 A pilot study conducted at the Halifax First Seizure Clinic (P.I. A. Omisade) informs the sample size  
42 calculation for this multi-centre study. The pilot represents the first study examining multi-modal  
43 biomarkers of seizure recurrence following untreated UFS (n=15 to date) and treated new onset epilepsy  
44 (NOE, n=14).  
45  
46  
47

48 Sample size estimates are based on group comparisons between the UFS-r and UFS-nr subgroups. Group  
49 sizes of 55 (UFS-r) and 72 (UFS-nr) are sufficient for cognitive impairment, anxiety/depression, and  
50 resting state fMRI data (see Supplementary Material).  
51  
52

53 For other EEG and MRI-derived network and connectivity measures, we rely on literature. A protocol  
54 for a prospective observational cohort study of seizure recurrence in patients with NDE using these data  
55 as predictors gives an estimate of 72 patients (24 with seizure recurrence, 48 without) and 48 controls  
56  
57  
58  
59

1 using a very stringent significance level of 0.001, power of 90% and effect size estimates based on their  
2 previous studies [42].  
3

4  
5 A sample size of 150 patients with UFS (of whom ~60 will experience a recurrence) and 75 healthy  
6 controls is sufficient to detect changes in all metrics for which we have pilot data and allows up to 12  
7 variables in the predictive model based on the rule-of-thumb  $\sqrt{\text{Sample size}}$  predictors. A further 50  
8 patients (25% of the total) will form an independent replication dataset.  
9  
10  
11

### 12 13 **Planned Study Visits**

14  
15 Patients will be seen in the First Seizure Clinics by a neurologist or nurse-practitioner within 2-4 weeks  
16 of the seizure event (Figure 2). The initial visit will involve a standard clinical assessment, review of  
17 inclusion and exclusion criteria, and, if appropriate, referral for the research study. The informed consent  
18 discussion will be conducted by a research assistant following the clinic visit. Participants will undergo  
19 cognitive screening assessment, MRI imaging and EEG (if not already done) within 2-4 weeks of the  
20 initial clinic visit (Figure 2).  
21  
22  
23  
24  
25

26 Seizure recurrence will be monitored by a diary provided to each participant with instructions to contact  
27 the research team in the event of a seizure. A member of the research team will follow up with participants  
28 by telephone at 3, 6, 9 and 12 months following the initial seizure. The primary outcome will be seizure  
29 recurrence at 12 months.  
30  
31  
32

33 Healthy control participants will complete the same neuropsychological battery, MRI scans and EEG  
34 protocols to evaluate baseline level of impairment in a healthy population, and for the group comparisons  
35 of UFS.  
36  
37  
38

### 39 **Clinical Variables**

40  
41 The following information will be documented at the time of the initial First Seizure clinic visit: age, sex,  
42 gender, time between seizure and clinic visit (in days), first seizure arising from sleep (yes/no), co-morbid  
43 neurological or psychiatric conditions (yes/no), substance use (yes/no and types of substances),  
44 medications and abnormal findings on neuroimaging (yes/no) if completed prior to the clinic visit.  
45  
46  
47  
48

### 49 **Neuropsychological Assessment Procedures**

50  
51 The cognitive screening battery is detailed in Table 1. Participants will complete mood questionnaires at  
52 the same time using the Hospital Anxiety and Depression Scale (HADS) [43], which generates separate  
53 scores for symptoms of depression and anxiety.  
54  
55  
56  
57  
58  
59  
60

**Table 1: Neuropsychological test battery**

| Cognitive Domain               | Tests/Scores                                                                         |
|--------------------------------|--------------------------------------------------------------------------------------|
| General intelligence (IQ)      | WASI-II Vocabulary and Matrix Reasoning Sub-Scales                                   |
| Attention and working memory   | WMS-IV Digit Span Total Score                                                        |
|                                | WMS-IV Symbol Span Total Score                                                       |
| Processing speed               | Symbol Digit Modalities Test - Oral                                                  |
|                                | Trails A - Oral                                                                      |
| Executive function             | DKEFS Verbal Fluency – Switching Subtest                                             |
|                                | DKEFS Color-Word Interference – Interference Subtest                                 |
|                                | Trails B - Oral                                                                      |
| Memory                         | Rey Auditory Verbal Learning Test (Immediate Recall Trial 5, Long Delay Free Recall) |
|                                | Aggie Figural Learning Test (as above)                                               |
| Language                       | WASI-II Vocabulary                                                                   |
|                                | DKEFS Verbal Fluency (Letter, Semantic)                                              |
|                                | Boston Naming Test                                                                   |
| Visuospatial/visuoconstruction | WASI-II Matrix Reasoning                                                             |
|                                | Taylor Complex Figure Copy                                                           |

*IQ: Intelligence quotient, WASI-II: Wechsler Abbreviated Scale of Intelligence 2<sup>nd</sup> edition [44], WMS-III: Wechsler Memory Scales 3<sup>rd</sup> edition [45], Symbol Digit Modalities Test [46], Trails A & B: Trail Making Test [47], DKEFS: Delis-Kaplan Executive Function Scales [48], Rey Auditory Verbal Learning Test [49], Aggie Figural Fluency [50], Boston Naming Test [51], Taylor Complex Figure Copy [52].*

## Neuroimaging Protocol

Neuroimaging in Kingston will take place on the 3T Siemens Magnetom Prisma Fit scanner located in the Centre for Neuroscience Studies at Queen's University. The protocol employs sequences adapted from the Human Connectome Project (<http://www.humanconnectomeproject.org/>) and diffusion-imaging is based on recommendations from DSI Studio (<http://dsi-studio.labsolver.org/Manual/b-table-for-qbi-dsi-and-gqi-scans>). The established protocol includes the following acquisitions:

- Structural scans including a 3D T1-weighted MPRAGE (0.8mm isotropic, 7 minutes), 3D T2-weighted SPACE (0.8mm isotropic, 6 minutes) and a T2-weighted FLAIR scan (1mm, 6 minutes); a 2D T2-weighted sequence with high in-plane resolution will be added to enable hippocampal assessments and in accordance with the HARNESS protocol [53]
- Resting state functional MRI (2mm isotropic, 8x Multiband, 800ms temporal resolution, acquired in 2 phase-encoding directions with additional field map, 15 minutes)
- Diffusion-weighted imaging (1.5mm isotropic, 4x Multiband, acquired with 185 diffusion-weighting directions over 2 shells in opposite phase encoding directions (98 directions in AP and 99 directions in PA), maximum b-value of 3000 s/mm<sup>2</sup>, with a reverse phase-encode non-diffusion weighted scan for distortion correction, 12 minutes).

A harmonised sequence will be implemented on the 3T GE MR750 scanner located in Halifax with a 32-channel Nova Medical coil and be validated with two human volunteers scanned at both sites. Image quality will be assessed using MRIQC ([poldracklab.github.io/mriqc/](http://poldracklab.github.io/mriqc/)). Any biases in quantitative metrics between the two sites will be corrected using ComBat, an algorithm first described in genomics that derives a batch-specific transformation to express all data in a common space removing any batch effects using an empirical Bayes framework [54]. In this case, the “batches” are the two centres. This approach has been validated in neuroimaging studies [55, 56] and used in prior multicentre epilepsy neuroimaging studies as part of the ENIGMA Consortium [57].

## EEG Protocol

A routine EEG will be acquired using standard electrode placement according to the 10-20 International System and a sampling rate of at least 500Hz and recorded for 30 minutes including hyperventilation and photic stimulation as standard activation procedures (assuming no contraindication). In Kingston, all EEG recordings will take place in Kingston Health Sciences Centre prior to the clinical assessment and in Halifax, they will take place 2-4 weeks following the initial clinic visit at the QEII Health Sciences

1  
2 Centre (as per local policies). If patients had completed an EEG elsewhere in Nova Scotia prior to the  
3 clinic visit, the EEG will be read by the epileptologists in Halifax.  
4  
5

## 6 **Data Analysis**

### 7 *Primary Outcome*

8  
9  
10 The primary outcome is seizure recurrence by 12 months. Participants will form 3 groups: healthy  
11 controls, participants with UFS and no seizure recurrence by 12 months (UFS-nr) and those with UFS  
12 and seizure recurrence (UFS-r). Initial analyses will compare all participants with UFS to healthy controls  
13 to determine baseline differences. Subsequent analyses will compare the UFS-nr and UFS-r cohorts to  
14 identify discriminatory variables for the multimodal predictive model.  
15  
16  
17  
18

### 19 *Neuropsychology*

20  
21 Individual assessments will be scored using published demographically corrected norms to produce  
22 individual standard scores for each task that will be converted to Z-scores. Both individual domain-  
23 specific and global Z-scores (i.e., average Z-score across entire battery) will be used for further analyses.  
24  
25  
26  
27

### 28 *Neuroimaging*

29  
30 Neuroimaging data will be stored using the BIDS (Brain Imaging Data Structure) specification [58] to  
31 facilitate subsequent processing.  
32

33 Anatomical MRI comprising T1-weighted images will be processed with FreeSurfer to yield volumes of  
34 key structures, such as the thalamus, and maps of cortical thickness. Group comparisons will be  
35 performed as documented above to identify key changes.  
36  
37  
38

39 Functional MRI will be preprocessed using fMRIPrep [59] and the brain will be parcellated into regions  
40 using the Desikan-Killiany atlas in FreeSurfer. Matrices of functional connectivity will be determined  
41 using fractional Amplitude of Low Frequency Fluctuations (fALFF) in different frequency bands.  
42 Network metrics such as clustering coefficient, characteristic path length and small-worldness [60] will  
43 be derived from the resulting connectivity graphs using Brain Connectivity Toolbox  
44 (<https://sites.google.com/site/bctnet/>) and compared between groups. Secondary analyses will include  
45 seed-to-voxel analyses of specific cognitive networks, such as the default mode network [35].  
46  
47  
48  
49

50 Diffusion-weighted MRI will be preprocessed with QSIprep (<https://qsiprep.readthedocs.io>) and  
51 tractography will be used to generate matrices of structural connectivity (Appendix). The connectivity  
52 matrices will be analysed with Brain Connectivity Toolbox and network metrics compared between  
53 groups. Key metrics will include characteristic path length, small-worldness and global efficiency [33].  
54  
55  
56  
57  
58  
59

1  
2 The functional and structural connectomes will also be analysed with Network-Based Statistics (NBS),  
3 a toolbox to robustly identify which parts of the connectome differ between groups and to identify  
4 potential factors to include in the machine-learning based multimodal prognostication model [34].  
5  
6

### 8 ***Electroencephalography***

9  
10 EEG data will be anonymized and exported from the hospital system and subsequently imported into  
11 EEGLAB (<https://sccn.ucsd.edu/eeglab/index.php>). Standard automated preprocessing will be used to  
12 remove artifacts [61] and the EEG will be converted to an average reference montage, excluding the  
13 channels that commonly contain artefact (e.g., eye blinking artefact in Fp1/Fp2). Using artefact-free  
14 epochs of EEG data, a band-pass filter will be used to split the data into commonly used frequency bands  
15 including delta (2-4Hz), theta (4-8Hz), lower alpha (8-10.5Hz), upper alpha (10.5-13Hz), lower beta (13-  
16 20Hz), higher beta (20-30Hz) and gamma (30-45Hz). For each frequency band, functional connectivity  
17 will be assessed between each channel using Phase Lag Index [62], coherence and synchronisation  
18 likelihood [63] and subsequently averaged across each channel. Group comparisons will be performed  
19 to identify potential factors for the prognostication model.  
20  
21  
22  
23  
24  
25  
26  
27

### 28 **Predictive Model**

29  
30 We will build a multivariate prediction model for seizure recurrence using binomial logistic regression  
31 with L2 regularisation to avoid overfitting.  
32

33  
34 Quantitative metrics derived from each modality will comprise the potential feature set (Figure 3), and  
35 the output will be the predicted probability of seizure recurrence within 12 months. Only features  
36 demonstrating the most significant differences between groups with and without seizure recurrence and  
37 lacking significant correlation with other such features (Pearson's  $r < 0.7$ ) will be retained aiming for a  
38 maximum of 12 features in the final model (based on the rule-of-thumb of  $\sqrt{\text{Sample}}$  features).  
39  
40

41  
42 For validation, we will apply stratified 10-fold cross validation, with inner folds used for model building  
43 and hyper-parameter tuning through grid search and outer folds used for unbiased test sets. Performance  
44 will be assessed using the Area Under the Receiver Operating Characteristics curve (AUC). Sensitivity,  
45 specificity, positive and negative predictive values will also be determined. After building our model, we  
46 will perform an independent validation using 50 subjects (25%) never included in model building.  
47  
48  
49  
50  
51  
52  
53  
54  
55  
56  
57  
58  
59  
60

## Timeline

This study will be conducted over a 5-year period beginning in 2023. Following setup and harmonization, data collection will occur over 30 months with a further 12 months of follow up. Data analysis and knowledge translation will start when 12-month follow-up data become available.

## Comparison to Other Studies

A recent protocol seeks to investigate seizure recurrence after UFS in 100 participants in the UK, with the majority having conventional MRI studies and only a minority undergoing advanced MRI sequences [64]. Whilst serum biomarkers are also included, we instead include a comprehensive neuropsychological assessment. Further, we include a control population for comparison and a larger sample size to enable the development of a predictive model.

A second study (SWISS FIRST) in Switzerland is prospectively recruiting patients presenting with a possible first seizure in Switzerland, and thus does not have the same rigorous exclusion criteria to ensure that only those with UFS as diagnosed by a neurologist are included [65]. No specific follow-up is planned outside routine clinical care. Analysis will include morphometry and functional connectivity from MRI, and spike maps and microstates from EEG to predict recurrence.

## Patient and Public Involvement

The identification and development of the research questions and outcomes has been informed by close collaboration with local epilepsy charities. Epilepsy South-Eastern Ontario (Kingston) works closely with Kingston Health Sciences Centre in providing support and counselling to patients, including those experiencing their first seizure. The Epilepsy Association of the Maritimes (Halifax) has worked closely with Nova Scotia Health for 40 years and notes frequent calls from people who have had a first seizure and are thus wondering if they will have another and if so, when. Both organisations have committed to disseminate research findings via education sessions, newsletters and social media feeds.

## Ethics and dissemination:

### Ethical Approval

This study was approved by the Health Sciences and Affiliated Teaching Hospitals Research Ethics Board at Queen's University (DMED-2681-22) and the Nova Scotia Research Ethics Board (1028519). It is registered with ClinicalTrials.gov with identifier NCT05724719.



## **Data Governance and Confidentiality**

The Kingston site will store written files, including consent forms and cognitive data, in a locked filing cabinet accessible only to Dr. Winston. MRI and EEG data will be stored on a secure server in the Centre for Neuroscience Studies. De-identified study participant ID's will be assigned to make data non-identifiable for data analysis. The master linking log will be securely saved on a password-protected server in the Centre for Neuroscience Studies at Queen's University, separate from the Data Collection/Capture Sheet. De-identified data will be stored electronically on a secure password protected server in the Centre for Neuroscience Studies and in a web-based database hosted by the Faculty of Health Sciences (RedCap).

The Halifax site will enter de-identified data directly on the Kingston based RedCap, and Halifax will have a separate linking log/database for identifiable data elements held locally. Data transferred to another site will be de-identified, transferred with SFTP, and encrypted. All data transfer will be covered by a data transfer agreement to/from Halifax.

After the storage period of 5 years beyond the end of the study, de-identified data will be archived indefinitely in the Queen's University's Institutional Repository as per the Canadian Institutes of Health Research requirements and Queens' University Policy. Confidentiality will be protected to the extent permitted by applicable laws.

## **Dissemination**

We will present results in peer-reviewed journals and at epilepsy-related national and international conferences (e.g. American Epilepsy Society, Canadian League Against Epilepsy, International Epilepsy Congress) and local events.

Findings will be presented to people with epilepsy and lay audience members in the Epilepsy Association of the Maritimes newsletter, via Epilepsy South-Eastern Ontario and supported with relevant talks via these patient support organizations.

## **Data Set**

All code and algorithms will be made available as open source on repositories such as Github.

1  
2 **Author's contributions:** The initial draft of the protocol was jointly developed by GPW and AO. KB,  
3 LBL, DB, JG, KI, MS, GS, BW, and SW reviewed and provided feedback on the protocol. BB and KBG  
4 performed a literature search to update the protocol following funding, and BB prepared the protocol for  
5 submission.  
6  
7

8  
9 **Funding statement:** This work was supported by the Canadian Institutes of Health Research (CIHR)  
10 grant number PJT-183906.  
11

12 **Competing interests statement:** None declared.  
13  
14  
15  
16  
17  
18  
19  
20  
21  
22  
23  
24  
25  
26  
27  
28  
29  
30  
31  
32  
33  
34  
35  
36  
37  
38  
39  
40  
41  
42  
43  
44  
45  
46  
47  
48  
49  
50  
51  
52  
53  
54  
55  
56  
57  
58  
59  
60

## References

1. Fisher, R.S., et al., Epileptic seizures and epilepsy: definitions proposed by the International League Against Epilepsy (ILAE) and the International Bureau for Epilepsy (IBE). *Epilepsia*, 2005. **46**(4): p. 470-2.
2. Fisher, R.S., et al., *ILAE official report: a practical clinical definition of epilepsy*. *Epilepsia*, 2014. **55**(4): p. 475-82.
3. Annegers, J.F., et al., *Incidence of acute symptomatic seizures in Rochester, Minnesota, 1935-1984*. *Epilepsia*, 1995. **36**(4): p. 327-33.
4. Hauser, W.A., J.F. Annegers, and L.T. Kurland, *Incidence of epilepsy and unprovoked seizures in Rochester, Minnesota: 1935-1984*. *Epilepsia*, 1993. **34**(3): p. 453-68.
5. Berg, A.T., *Risk of recurrence after a first unprovoked seizure*. *Epilepsia*, 2008. **49 Suppl 1**: p. 13-8.
6. Berg, A.T. and S. Shinnar, *The risk of seizure recurrence following a first unprovoked seizure: a quantitative review*. *Neurology*, 1991. **41**(7): p. 965-72.
7. Krumholz, A., et al., *Evidence-based guideline: Management of an unprovoked first seizure in adults: Report of the Guideline Development Subcommittee of the American Academy of Neurology and the American Epilepsy Society*. *Neurology*, 2015. **84**(16): p. 1705-13.
8. Crocker, C.E., B. Pohlmann-Eden, and M.H. Schmidt, *Role of neuroimaging in first seizure diagnosis*. *Seizure*, 2017. **49**: p. 74-78.
9. Rizvi, S., et al., *Epidemiology of early stages of epilepsy: Risk of seizure recurrence after a first seizure*. *Seizure*, 2017. **49**: p. 46-53.
10. Foster, E., et al., *First seizure presentations in adults: beyond assessment and treatment*. *J Neurol Neurosurg Psychiatry*, 2019. **90**(9): p. 1039-1045.
11. Bernhardt, B.C., L. Bonilha, and D.W. Gross, *Network analysis for a network disorder: The emerging role of graph theory in the study of epilepsy*. *Epilepsy Behav*, 2015. **50**: p. 162-70.
12. Richardson, M.P., *Large scale brain models of epilepsy: dynamics meets connectomics*. *J Neurol Neurosurg Psychiatry*, 2012. **83**(12): p. 1238-48.
13. Hermann, B.P., et al., *Cognitive prognosis in chronic temporal lobe epilepsy*. *Ann Neurol*, 2006. **60**(1): p. 80-7.
14. Pohlmann-Eden, B., et al., *The relevance of neuropsychiatric symptoms and cognitive problems in new-onset epilepsy - Current knowledge and understanding*. *Epilepsy Behav*, 2015. **51**: p. 199-209.

15. Eddy, C.M., H.E. Rickards, and A.E. Cavanna, *The cognitive impact of antiepileptic drugs*. *Ther Adv Neurol Disord*, 2011. **4**(6): p. 385-407.
16. Helmstaedter, C., et al., *Disentangling the relationship between epilepsy and its behavioral comorbidities - the need for prospective studies in new-onset epilepsies*. *Epilepsy Behav*, 2014. **31**: p. 43-7.
17. Witt, J.A. and C. Helmstaedter, *Should cognition be screened in new-onset epilepsies? A study in 247 untreated patients*. *J Neurol*, 2012. **259**(8): p. 1727-31.
18. Jackson-Tarlton, C.S., et al., *A prospective pilot study of cognitive impairment and mood in adults with first seizure, new-onset epilepsy, and newly diagnosed epilepsy at time of initial seizure presentation*. *Epilepsy Behav*, 2020. **112**: p. 107359.
19. Scott, A.J., et al., *How frequently is anxiety and depression identified and treated in hospital and community samples of adults with epilepsy?* *Epilepsy Behav*, 2021. **115**: p. 107703.
20. Gurgu, R.S., et al., *Psychiatric comorbidities in adult patients with epilepsy (A systematic review)*. *Exp Ther Med*, 2021. **22**(2): p. 909.
21. Thapar, A., M. Kerr, and G. Harold, *Stress, anxiety, depression, and epilepsy: investigating the relationship between psychological factors and seizures*. *Epilepsy Behav*, 2009. **14**(1): p. 134-40.
22. Lane, C., et al., *Anxiety and Depression in Adult First Seizure Presentations*. *Can J Neurol Sci*, 2018. **45**(2): p. 144-149.
23. Hesdorffer, D.C., et al., *Depression and suicide attempt as risk factors for incident unprovoked seizures*. *Ann Neurol*, 2006. **59**(1): p. 35-41.
24. Baldin, E., et al., *Stress is associated with an increased risk of recurrent seizures in adults*. *Epilepsia*, 2017. **58**(6): p. 1037-1046.
25. Whelan, C.D., et al., *Structural brain abnormalities in the common epilepsies assessed in a worldwide ENIGMA study*. *Brain*, 2018. **141**(2): p. 391-408.
26. Perani, S., et al., *Thalamic volume reduction in drug-naive patients with new-onset genetic generalized epilepsy*. *Epilepsia*, 2018. **59**(1): p. 226-234.
27. Leek, N.J., et al., *Thalamohippocampal atrophy in focal epilepsy of unknown cause at the time of diagnosis*. *Eur J Neurol*, 2021. **28**(2): p. 367-376.
28. Bernhardt, B.C., et al., *Mapping thalamocortical network pathology in temporal lobe epilepsy*. *Neurology*, 2012. **78**(2): p. 129-36.
29. McGill, M.L., et al., *Functional neuroimaging abnormalities in idiopathic generalized epilepsy*. *Neuroimage Clin*, 2014. **6**: p. 455-62.

- 1
- 2 30. Schmidt, M.H., et al., *Toward individualized prediction of seizure recurrence: Hippocampal*
- 3 *neuroimaging features in a cohort of patients from a first seizure clinic.* *Epilepsy Behav*, 2021.
- 4 **122**: p. 108118.
- 5
- 6
- 7 31. Bullmore, E. and O. Sporns, *Complex brain networks: graph theoretical analysis of structural*
- 8 *and functional systems.* *Nat Rev Neurosci*, 2009. **10**(3): p. 186-98.
- 9
- 10 32. Vaughan, D.N., et al., *MRI-negative temporal lobe epilepsy: A network disorder of neocortical*
- 11 *connectivity.* *Neurology*, 2016. **87**(18): p. 1934-1942.
- 12
- 13
- 14 33. Park, K.M., et al., *Progressive topological disorganization of brain network in focal epilepsy.*
- 15 *Acta Neurol Scand*, 2018. **137**(4): p. 425-431.
- 16
- 17 34. Kreilkamp, B.A.K., et al., *Altered structural connectome in non-lesional newly diagnosed focal*
- 18 *epilepsy: Relation to pharmaco-resistance.* *Neuroimage Clin*, 2021. **29**: p. 102564.
- 19
- 20 35. Alonazi, B.K., et al., *Resting-state functional brain networks in adults with a new diagnosis of*
- 21 *focal epilepsy.* *Brain Behav*, 2019. **9**(1): p. e01168.
- 22
- 23
- 24 36. Gupta, L., et al., *Towards prognostic biomarkers from BOLD fluctuations to differentiate a first*
- 25 *epileptic seizure from new-onset epilepsy.* *Epilepsia*, 2017. **58**(3): p. 476-483.
- 26
- 27 37. van Diessen, E., et al., *Improved diagnosis in children with partial epilepsy using a multivariable*
- 28 *prediction model based on EEG network characteristics.* *PLoS One*, 2013. **8**(4): p. e59764.
- 29
- 30 38. Koo, G.E., et al., *Is Functional Connectivity after a First Unprovoked Seizure Different Based on*
- 31 *Subsequent Seizures and Future Diagnosis of Epilepsy?* *J Epilepsy Res*, 2022. **12**(2): p. 62-67.
- 32
- 33 39. Douw, L., et al., *'Functional connectivity' is a sensitive predictor of epilepsy diagnosis after the*
- 34 *first seizure.* *PLoS One*, 2010. **5**(5): p. e10839.
- 35
- 36 40. Matos, J., et al., *Diagnosis of Epilepsy with Functional Connectivity in EEG after a Suspected*
- 37 *First Seizure.* *Bioengineering (Basel)*, 2022. **9**(11).
- 38
- 39 41. Drenthen, G.S., et al., *Predictive value of functional MRI and EEG in epilepsy diagnosis after a*
- 40 *first seizure.* *Epilepsy Behav*, 2021. **115**: p. 107651.
- 41
- 42 42. de Bezenac, C., et al., *Investigating imaging network markers of cognitive dysfunction and*
- 43 *pharmaco-resistance in newly diagnosed epilepsy: a protocol for an observational cohort study*
- 44 *in the UK.* *BMJ Open*, 2019. **9**(10): p. e034347.
- 45
- 46 43. Snaith, R.P., *The Hospital Anxiety And Depression Scale.* *Health Qual Life Outcomes*, 2003. **1**:
- 47 p. 29.
- 48
- 49 44. Wechsler, D., *WASI II: Wechsler Abbreviated Scale of Intelligence.* 2nd ed. 2011, Texas: Pearson.
- 50 45. Wechsler, D., *Wechsler Memory Scale. 3rd ed (WMS-III). Technical and Interpretive Manual.*
- 51 2003, Texas: Pearson.
- 52
- 53
- 54
- 55
- 56
- 57
- 58
- 59

- 1
- 2 46. Smith, A., *Symbol digit modalities test: SDMT*. 2000, California: Testzentrale.
- 3
- 4 47. Heaton, R.K., et al., *Revised Comprehensive Norms for an Expanded Halstead-Reitan Battery: Demographically Adjusted Neuropsychological Norms for African American and Caucasian*
- 5 *Adults*. 2004, Lutz, Florida: Psychological Assessment Resources, Inc.
- 6
- 7
- 8
- 9 48. Delis, D.C., E. Kaplan, and J.H. Kramer, *Delis-Kaplan Executive Function System (DKEFS)*.
- 10 2001, San Antonio, Texas: Pearson.
- 11
- 12 49. Schmidt, M., *Rey Auditory and Verbal Learning Test. A handbook*. 1996, California: Western
- 13 Psychological Association.
- 14
- 15 50. Majdan, A., V. Sziklas, and M. Jones-Gotman, *Performance of healthy subjects and patients with*
- 16 *resection from the anterior temporal lobe on matched tests of verbal and visuo-perceptual*
- 17 *learning*. J Clin Exp Neuropsychol, 1996. **18**(3): p. 416-30.
- 18
- 19
- 20
- 21 51. Goodglass, H., E. Kaplan, and S. Weintraub, *Boston Naming Test*. 1983, Pennsylvania: Lea &
- 22 Febinger.
- 23
- 24 52. Taylor, L.B., *Localisation of cerebral lesions by psychological testing*. Clin Neurosurg, 1969. **16**:
- 25 p. 269-87.
- 26
- 27
- 28 53. Wang, I., et al., *MRI essentials in epileptology: a review from the ILAE Imaging Taskforce*.
- 29 Epileptic Disord, 2020. **22**(4): p. 421-437.
- 30
- 31 54. Johnson, W.E., C. Li, and A. Rabinovic, *Adjusting batch effects in microarray expression data*
- 32 *using empirical Bayes methods*. Biostatistics, 2007. **8**(1): p. 118-27.
- 33
- 34
- 35 55. Fortin, J.P., et al., *Harmonization of multi-site diffusion tensor imaging data*. Neuroimage, 2017.
- 36 **161**: p. 149-170.
- 37
- 38 56. Yu, M., et al., *Statistical harmonization corrects site effects in functional connectivity*
- 39 *measurements from multi-site fMRI data*. Hum Brain Mapp, 2018. **39**(11): p. 4213-4227.
- 40
- 41 57. Sisodiya, S.M., et al., *The ENIGMA-Epilepsy working group: Mapping disease from large data*
- 42 *sets*. Hum Brain Mapp, 2020.
- 43
- 44
- 45 58. Gorgolewski, K.J., et al., *The brain imaging data structure, a format for organizing and*
- 46 *describing outputs of neuroimaging experiments*. Sci Data, 2016. **3**: p. 160044.
- 47
- 48 59. Esteban, O., et al., *fMRIPrep: a robust preprocessing pipeline for functional MRI*. Nat Methods,
- 49 2019. **16**(1): p. 111-116.
- 50
- 51 60. Rubinov, M. and O. Sporns, *Complex network measures of brain connectivity: uses and*
- 52 *interpretations*. Neuroimage, 2010. **52**(3): p. 1059-69.
- 53
- 54 61. Pedroni, A., A. Bahreini, and N. Langer, *Automagic: Standardized preprocessing of big EEG*
- 55 *data*. Neuroimage, 2019. **200**: p. 460-473.
- 56
- 57
- 58
- 59
- 60

- 1  
2 62. Stam, C.J., G. Nolte, and A. Daffertshofer, *Phase lag index: assessment of functional connectivity*  
3 *from multi channel EEG and MEG with diminished bias from common sources*. Hum Brain Mapp,  
4 2007. **28**(11): p. 1178-93.  
5  
6  
7 63. Stam, C.J. and B.W. van Dijk, *Synchronization likelihood: an unbiased measure of generalized*  
8 *synchronization in multivariate data sets*. Physica D, 2002. **163**(3): p. 236-251.  
9  
10 64. Adan, G.H., et al., *Protocol for an observational cohort study investigating biomarkers predicting*  
11 *seizure recurrence following a first unprovoked seizure in adults*. BMJ Open, 2022. **12**(12): p.  
12 e065390.  
13  
14  
15 65. Jin, B.Z., et al., *Diagnosis of epilepsy after first seizure. Introducing the SWISS FIRST study*.  
16 Clinical and Translational Neuroscience, 2020. **4**(2): p. 2514183X20939448.  
17  
18  
19  
20  
21  
22  
23  
24  
25  
26  
27  
28  
29  
30  
31  
32  
33  
34  
35  
36  
37  
38  
39  
40  
41  
42  
43  
44  
45  
46  
47  
48  
49  
50  
51  
52  
53  
54  
55  
56  
57  
58  
59  
60

1  
2 **Figures**

3  
4 *Figure 1: Progression from UFS to epilepsy*  
5  
6  
7  
8  
9  
10  
11  
12  
13  
14  
15  
16  
17  
18  
19  
20  
21  
22  
23  
24  
25  
26  
27  
28  
29  
30  
31  
32  
33  
34  
35  
36  
37  
38  
39  
40  
41  
42  
43  
44  
45  
46  
47  
48  
49  
50  
51  
52  
53  
54  
55  
56  
57  
58  
59  
60

For peer review only



1  
2  
3  
4  
5  
6  
7  
8  
9  
10  
11  
12  
13  
14  
15  
16  
17  
18  
19  
20  
21  
22  
23  
24  
25  
26  
27  
28  
29  
30  
31  
32  
33  
34  
35  
36  
37  
38  
39  
40  
41  
42  
43  
44  
45  
46  
47  
48  
49  
50  
51  
52  
53  
54  
55  
56  
57  
58  
59  
60

*Figure 2: Individual patient study participation timeline*

For peer review only

1  
2 **Figure 3: Modelling approach** (*fALFF* = fractional amplitude of low frequency fluctuations, *PLI* =  
3 phase lag index, *SL* = synchronisation likelihood)  
4  
5  
6  
7  
8  
9  
10  
11  
12  
13  
14  
15  
16  
17  
18  
19  
20  
21  
22  
23  
24  
25  
26  
27  
28  
29  
30  
31  
32  
33  
34  
35  
36  
37  
38  
39  
40  
41  
42  
43  
44  
45  
46  
47  
48  
49  
50  
51  
52  
53  
54  
55  
56  
57  
58  
59  
60

For peer review only

1  
2  
3  
4  
5  
6  
7  
8  
9  
10  
11  
12  
13  
14  
15  
16  
17  
18  
19  
20  
21  
22  
23  
24  
25  
26  
27  
28  
29  
30  
31  
32  
33  
34  
35  
36  
37  
38  
39  
40  
41  
42  
43  
44  
45  
46  
47  
48  
49  
50  
51  
52  
53  
54  
55  
56  
57  
58  
59  
60

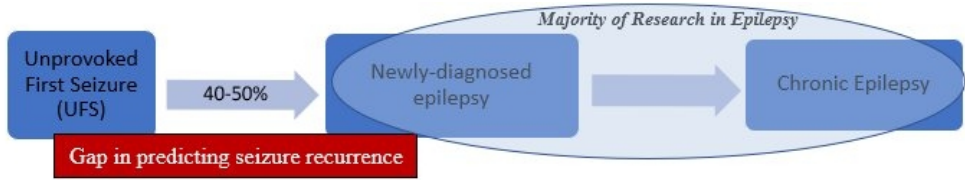

Figure 1: Progression from UFS to epilepsy

58x11mm (300 x 300 DPI)

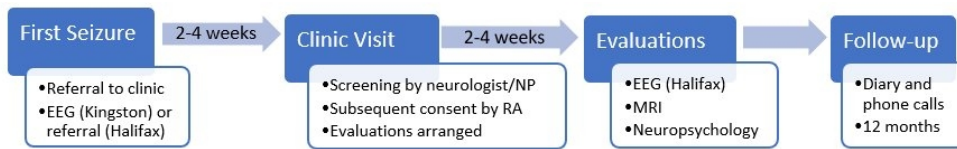

Figure 2: Individual patient study participation timeline

75x12mm (300 x 300 DPI)

1  
2  
3  
4  
5  
6  
7  
8  
9  
10  
11  
12  
13  
14  
15  
16  
17  
18  
19  
20  
21  
22  
23  
24  
25  
26  
27  
28  
29  
30  
31  
32  
33  
34  
35  
36  
37  
38  
39  
40  
41  
42  
43  
44  
45  
46  
47  
48  
49  
50  
51  
52  
53  
54  
55  
56  
57  
58  
59  
60

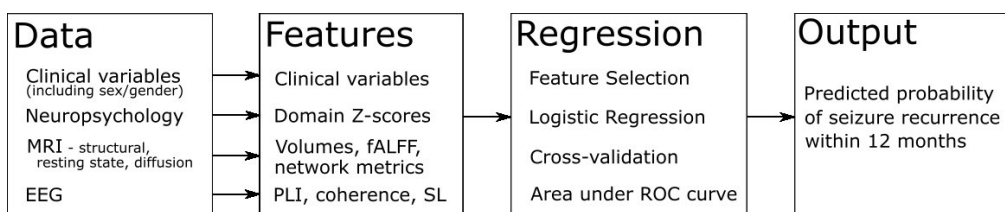

Figure 3: Modelling approach (fALFF = fractional amplitude of low frequency fluctuations, PLI = phase lag index, SL = synchronisation likelihood)

97x19mm (300 x 300 DPI)

## Supplementary Material

### Sample Size Calculation

Cognitive impairment (at least one Z-score in the impaired range  $\leq -1.5$ , 7th percentile) was present in 73% of UFS patients. Global Z-scores across cognitive tasks in UFS-r patients demonstrated mild but significantly greater cognitive dysfunction (n=4, mean -0.51, std 0.7) than patients in the UFS-nr group (n=8, mean 0.11, std 0.4) (t=2.14,  $p < 0.05$ ,  $d = 0.69$ ; Mann-Whitney U=5,  $p < 0.05$ ,  $r = 0.54$ ) (Supplementary Figure 1). The required sample size (significance 0.05, 80% power) is 55 participants per group.

Clinically significant symptoms of anxiety and depression (scores above clinical cutoffs on the GAD-7 and NDDI-E questionnaires) were observed in 50% and 58% of all UFS patients. In the UFS-r group, the scores fell in the clinically significant range in 50% and 75% of patients respectively. In the UFS-nr group, the rates of clinically significant scores were both 50%. To detect differences on the depression scale between the two UFS groups in the proposed study, the required sample sizes (significance 0.05, 80% power) are  $n = 72$  for the non-recurrence group and  $n = 48$  for the recurrence group.

rsfMRI analyses were performed on all UFS patients with MRI data ( $n = 8$ ) and age-matched controls ( $n = 8$ ) as comparison of UFS-r and UFS-nr was not possible due to missing MRI data. Global efficiency of the DMN differed between groups at  $p < 0.05$  with an effect size of  $d = 0.89$ . With respect to specific DMN nodes, the left posterior cingulate betweenness centrality differed between groups at  $p < 0.05$  with an effect size of  $d = 0.74$ . Based on these effect sizes, the required sample size (for significance 0.05, 80% power) were estimated at 15 and 51 participants per group, respectively.

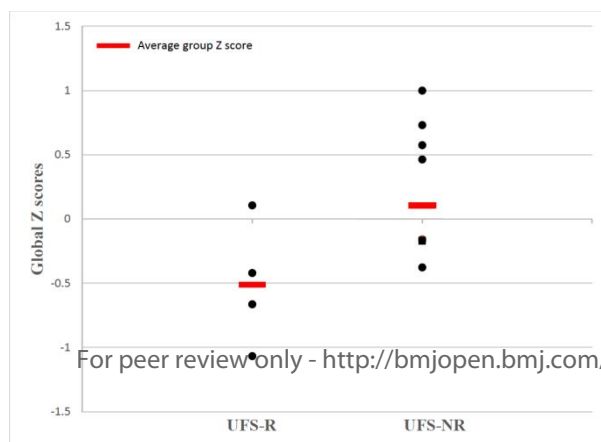

***Supplementary Figure 1: Cognitive performance in UFS-r, UFS-nr***

# BMJ Open

## Literature review and protocol for a prospective multi-centre cohort study on multimodal prediction of seizure recurrence after unprovoked first seizure

|                                 |                                                                                                                                                                                                                                                                                                                                                                                                                                                                                                                                                                                                                                                                                                                                                                                                                                                                                                                                                                                                                                                                                                         |
|---------------------------------|---------------------------------------------------------------------------------------------------------------------------------------------------------------------------------------------------------------------------------------------------------------------------------------------------------------------------------------------------------------------------------------------------------------------------------------------------------------------------------------------------------------------------------------------------------------------------------------------------------------------------------------------------------------------------------------------------------------------------------------------------------------------------------------------------------------------------------------------------------------------------------------------------------------------------------------------------------------------------------------------------------------------------------------------------------------------------------------------------------|
| Journal:                        | <i>BMJ Open</i>                                                                                                                                                                                                                                                                                                                                                                                                                                                                                                                                                                                                                                                                                                                                                                                                                                                                                                                                                                                                                                                                                         |
| Manuscript ID                   | bmjopen-2024-086153.R1                                                                                                                                                                                                                                                                                                                                                                                                                                                                                                                                                                                                                                                                                                                                                                                                                                                                                                                                                                                                                                                                                  |
| Article Type:                   | Protocol                                                                                                                                                                                                                                                                                                                                                                                                                                                                                                                                                                                                                                                                                                                                                                                                                                                                                                                                                                                                                                                                                                |
| Date Submitted by the Author:   | 21-Mar-2024                                                                                                                                                                                                                                                                                                                                                                                                                                                                                                                                                                                                                                                                                                                                                                                                                                                                                                                                                                                                                                                                                             |
| Complete List of Authors:       | Beattie, Brooke; Queen's University, Centre for Neuroscience Studies<br>Batista García-Ramó, Karla; Queen's University, Centre for Neuroscience Studies/Department of Medicine<br>Biggs, Krista; Nova Scotia Health Authority<br>Boissé Lomax, Lysa; Queen's University, Centre for Neuroscience Studies/Department of Medicine<br>Brien, Donald; Queen's University, Centre for Neuroscience Studies<br>Gallivan, Jason; Queen's University, Centre for Neuroscience Studies/Department of Psychology<br>Ikeda, Kristin; Dalhousie University, Department of Medicine/Neurology<br>Schmidt, Matthias; Dalhousie University, Department of Diagnostic Radiology<br>Shukla, Garima; Queen's University, Centre for Neuroscience Studies/Department of Medicine<br>Whatley, Benjamin; Dalhousie University, Department of Medicine/Neurology<br>Woodroffe, Stephanie; Dalhousie University, Department of Medicine/Neurology<br>Omisade, Antonina; Nova Scotia Health Authority<br>Winston, Gavin; Epilepsy Society, MRI Unit; Queen's University, Centre for Neuroscience Studies/Department of Medicine |
| <b>Primary Subject Heading</b>: | Neurology                                                                                                                                                                                                                                                                                                                                                                                                                                                                                                                                                                                                                                                                                                                                                                                                                                                                                                                                                                                                                                                                                               |
| Secondary Subject Heading:      | Radiology and imaging                                                                                                                                                                                                                                                                                                                                                                                                                                                                                                                                                                                                                                                                                                                                                                                                                                                                                                                                                                                                                                                                                   |
| Keywords:                       | Epilepsy < NEUROLOGY, Magnetic Resonance Imaging, Electroencephalography, Cognition, Machine Learning                                                                                                                                                                                                                                                                                                                                                                                                                                                                                                                                                                                                                                                                                                                                                                                                                                                                                                                                                                                                   |
|                                 |                                                                                                                                                                                                                                                                                                                                                                                                                                                                                                                                                                                                                                                                                                                                                                                                                                                                                                                                                                                                                                                                                                         |

SCHOLARONE™  
Manuscripts

1  
2 **Title:** Literature review and protocol for a prospective multi-centre cohort study on multimodal  
3 prediction of seizure recurrence after unprovoked first seizure  
4  
5  
6  
7

8 **Authors:** Brooke Beattie<sup>1</sup>, Karla Batista García-Ramó<sup>1,2</sup>, Krista Biggs<sup>3</sup>, Lysa Boissé Lomax<sup>1,2</sup>, Donald  
9 Brien<sup>1</sup>, Jason Gallivan<sup>1,4</sup>, Kristin Ikeda<sup>5</sup>, Matthias Schmidt<sup>6</sup>, Garima Shukla<sup>1,2</sup>, Benjamin Whatley<sup>5</sup>,  
10 Stephanie Woodroffe<sup>5</sup>, Antonina Omisade<sup>3\*</sup>, Gavin P Winston<sup>1,2\*</sup>  
11  
12

13  
14 \* Joint senior authors  
15  
16  
17  
18

19 <sup>1</sup>Centre for Neuroscience Studies, Queen's University, Kingston ON, Canada  
20

21 <sup>2</sup>Department of Medicine, Queen's University, Kingston ON, Canada  
22

23 <sup>3</sup>Nova Scotia Health Authority, Halifax NS, Canada  
24

25 <sup>4</sup>Department of Psychology, Queen's University, Kingston ON, Canada  
26  
27

28 <sup>5</sup>Department of Medicine/Neurology, Dalhousie University, Halifax NS, Canada  
29  
30

31 <sup>6</sup>Department of Diagnostic Radiology, Dalhousie University, Halifax NS, Canada  
32  
33  
34

35 **Corresponding Author**

36 Dr Gavin P Winston  
37

38 Queen's University  
39

40 76 Stuart Street  
41

42 Kingston, Ontario  
43

44 K7L 2V7  
45

46 [gavin.winston@queensu.ca](mailto:gavin.winston@queensu.ca)  
47  
48  
49  
50  
51  
52  
53  
54  
55  
56  
57  
58  
59  
60



## **Abstract:**

**Introduction:** Epilepsy is a common neurological disorder characterised by recurrent seizures. Almost half of patients that have an unprovoked first seizure (UFS) have additional seizures and develop epilepsy. No current predictive models exist to determine who has a higher risk of recurrence to guide treatment. Emerging evidence suggests alterations in cognition, mood, and brain connectivity exist in the population with UFS. Baseline evaluations of these factors following an UFS will enable the development of the first multimodal biomarker-based predictive model of seizure recurrence in adults with UFS.

**Methods and analysis:** 200 patients and 75 matched healthy controls (aged 18-65) from the Kingston and Halifax First Seizure Clinics will undergo neuropsychological assessments, structural and functional magnetic resonance imaging, and electroencephalography. Seizure recurrence will be assessed prospectively. Regular follow-ups will occur at 3, 6, 9, and 12 months to monitor recurrence. Comparisons will be made between patients with UFS and healthy control groups, as well as between patients with and without seizure recurrence at follow-up. A multimodal machine learning model will be trained to predict seizure recurrence at 12 months.

**Ethics and dissemination:** This study was approved by the Health Sciences and Affiliated Teaching Hospitals Research Ethics Board at Queen's University (DMED-2681-22) and the Nova Scotia Research Ethics Board (1028519). It is supported by the Canadian Institutes of Health Research (PJT-183906). Findings will be presented at national and international conferences, published in peer-reviewed journals and presented to the public via patient support organization newsletters and talks.

**Registration details:** ClinicalTrials.gov Identifier: NCT05724719

**Keywords:** Epilepsy, magnetic resonance imaging, electroencephalography, cognition

1  
2 **Strengths and limitations of this study:** (maximum of 5 bullet points relating to the methods)  
3

- 4  
5 1. Our proposed multi-modal biomarker-based predictive model of seizure recurrence after  
6 unprovoked first seizure integrates behavioral, EEG and MRI data.  
7  
8 2. The multi-center nature of this study allows for preliminary assessment of the model in two  
9 demographically and culturally distinct groups of Canadian patients.  
10  
11 3. However, the study is only recruiting from the Canadian population which may limit  
12 generalisability.  
13  
14 4. Since recruitment is based on occurrence of clinical events and is contingent on factors  
15 impacting first seizure clinic capacity (e.g., changes in staffing or wait lists), delays to  
16 completion may occur.  
17  
18  
19  
20  
21  
22  
23  
24  
25  
26  
27  
28  
29  
30  
31  
32  
33  
34  
35  
36  
37  
38  
39  
40  
41  
42  
43  
44  
45  
46  
47  
48  
49  
50  
51  
52  
53  
54  
55  
56  
57  
58  
59  
60

## **Introduction:**

### **Background and Rationale**

#### ***Epilepsy, First Seizure and Recurrence Risk***

Epilepsy is a disorder of the brain characterized by an “enduring predisposition to generate epileptic seizures” [1], manifesting as at least two unprovoked seizures >24 hours apart or one unprovoked seizure with a >60% risk of recurrence [2]. The prevalence of active epilepsy is around 1% but up to 10% of the population will experience a single seizure at some point in their lives [3, 4]. Seizures may be provoked by toxic/metabolic disturbances, trauma, or stroke but most cases are unprovoked first seizure (UFS).

Following an UFS and in the absence of treatment, 40-50% of these individuals will have further seizures within 2 years and thus be diagnosed with epilepsy (Figure 1) [5, 6]. Most recurrence (~40%) occurs in the first year. Evidence-based guidelines identify four clinical factors that increase the risk of recurrence following UFS [7] including epileptiform abnormalities on EEG, a remote symptomatic cause (e.g. brain tumor on neuroimaging), abnormal neurological examination and a first seizure during sleep.

Anti-seizure medications may be offered to individuals with identified risk factors. However, most patients with UFS have normal examination, EEG and brain imaging at presentation [8, 9] (Figure 1).

#### ***Current Challenges in Clinical Decision Making***

In patients with UFS and no adverse prognostic factors, typical clinical practice is to defer treatment until after a second event. This approach is associated with morbidity through increased risk of accidents (e.g., falls, motor vehicle accidents), carries implications for driving privileges, and can also have profound psychosocial impact (e.g., impact on employment, education, and mental health). On the other hand, while early treatment after an UFS can reduce the risk of seizure recurrence by around 35% in the short term [7], it is associated with medication side effects in up to 31% of patients [7]. Hence, offering treatment to patients at low risk of recurrence may mean unnecessary treatment with its associated adverse effects. The ability to determine individual recurrence risk after UFS would help determine whether early treatment is warranted, and whether the potential benefits outweigh the risks [10].

#### ***Epilepsy as a Network Disorder and Limitations in the Literature***

Epilepsy is increasingly conceptualised as a network disorder [11] with seizures sustained by microstructural or biochemical disturbances in normal-appearing brain tissue outside of the presumed seizure focus [12]. Widespread changes in structural and functional brain connectivity, and behavioral manifestations of these changes including cognitive dysfunction [13, 14] and mood disturbance, may yield biomarkers for clinical outcomes.

1  
2 Most research to date has focused on individuals with chronic or newly diagnosed epilepsy (NDE)  
3 (Figure 1), but there is increasing evidence that these changes are detectable prior to the time of formal  
4 diagnosis. Despite this, the population with UFS remains significantly underexplored.  
5

6  
7 Studying patients following UFS and before medication is commenced removes the confounding factor  
8 of anti-seizure medication use on cognition and brain networks present in most studies [15]. Furthermore,  
9 baseline evaluation of multiple factors indicative of neurological network dysfunction will enable the  
10 development of the first multimodal approach that can be applied to prediction of seizure recurrence at  
11 the earliest stages of epilepsy. We will incorporate the following 3 domains to predict seizure recurrence:  
12  
13  
14  
15

### 16 17 ***Domain 1 – Neuropsychological Comorbidity - Cognitive Dysfunction***

18  
19 Cognitive dysfunction is evident at all stages of epilepsy, relates to seizure frequency and severity, and  
20 may predict clinical course [13, 14]. Up to 80% of individuals with chronic epilepsy have cognitive  
21 impairment [16] and approximately 40% of treatment-naive patients with new-onset epilepsy have  
22 cognitive dysfunction in at least two domains [17].  
23  
24  
25

26  
27 Cognitive dysfunction may already be present following a first seizure. A recently published study from  
28 our Halifax First Seizure Clinic, reported cognitive dysfunction in at least one cognitive domain in 56%  
29 of patients with NDE and UFS [18]. Within the UFS subgroup, prevalence of cognitive dysfunction in at  
30 least one domain was 41.2%. Individuals with UFS who were subsequently diagnosed with epilepsy were  
31 significantly more likely to demonstrate cognitive dysfunction at presentation than those who did not.  
32  
33  
34  
35

### 36 37 ***Domain 2 – Psychiatric Comorbidity – Depression and Anxiety***

38  
39 Depression and anxiety are common psychiatric co-morbidities of epilepsy, with prevalence ranging  
40 from 40 to 69% and from 31 to 65% respectively depending on the setting and method of evaluation [19,  
41 20]. Although mood and anxiety disorders are often considered a consequence of epilepsy, there is  
42 evidence of bi-directional relationship between these psychiatric conditions and seizure control [21].  
43  
44

45  
46 Patients presenting to the Halifax First Seizure Clinic have a significantly higher prevalence of both  
47 depression and anxiety compared to controls [22]. Depression and a history of suicide attempts each  
48 significantly increases the risk of UFS [23]. Individuals with UFS who are later diagnosed with epilepsy  
49 had an increased rate of depression compared to controls, while those without further seizures did not  
50 [19]. Anxiety is highly prevalent in UFS and associated with an increased risk of seizure recurrence [24].  
51  
52  
53  
54  
55  
56  
57  
58  
59  
60

### ***Domain 3 – Alterations in Brain Structure and Connectivity***

Subtle brain network disturbances associated with seizures can also be explored using anatomical scans and measures of structural and functional connectivity derived from MRI and EEG.

#### **Anatomical Changes**

In patients with epilepsy, multicentre studies reveal widespread altered subcortical volumes and cortical thinning [25]. Thalamic atrophy has been documented in patients scanned within a week of first seizure [26], and hippocampal atrophy has been observed in newly diagnosed focal epilepsy [27]. The integrity of the thalamus and thalamocortical connectivity are key in both focal [28] and generalized epilepsy [29], so may yield early biomarkers of epilepsy. Measures of hippocampal volume and diffusion parameters can distinguish participants with and without seizure recurrence in early disease [30].

#### **Structural Connectivity**

Structural integrity is primarily studied via diffusion-weighted imaging. Maps of structural connectivity can be analysed with graph theory to assess changes in brain networks [31, 32]. Network metrics such as characteristic path length, small-worldness and global efficiency differ between subjects with focal epilepsy and controls [33]. A reduction in network efficiency and bilateral alterations in network connectivity are also observed in patients with newly diagnosed focal epilepsy [34]. However, no studies explore structural connectivity in relation to seizure recurrence in the UFS population.

#### **Functional Connectivity - MRI**

Resting-state functional MRI (rsfMRI) combines high spatial and temporal resolution to provide an index of functional brain connectivity. In newly diagnosed focal epilepsy, altered functional connectivity is observed within the frontoparietal attentional network [35]. Alterations in fractional amplitude of low frequency fluctuations (fALFF) can differentiate patients with new-onset epilepsy from those with first seizure [36]. No studies specifically address seizure recurrence after UFS.

#### **Functional Connectivity - EEG**

Electroencephalography (EEG) provides a complementary means to assess functional connectivity with exceptional temporal resolution. A decision tree-based machine learning classifier applied to network metrics from baseline EEG classified children referred with suspected epilepsy as having epilepsy or not with much greater sensitivity (96%) and specificity (95%) than the presence of interictal discharges [37].

Multiple papers have found evidence to support the presence of different network connectivity patterns after the UFS in those later diagnosed with epilepsy versus controls, including decreased alpha and beta band connectivity [38] and increased theta band connectivity [39]. Applying machine learning to combined functional connectivity and frequency-based features can help diagnose epilepsy [40], and machine learning applied to combined EEG and rsfMRI data demonstrates greater accuracy in predicting seizure recurrence than the clinical impression alone [41]. EEG features including phase lag index, coherence, and synchronization likelihood were the most discriminatory.

## Summary of Studies

There is ample evidence that cognitive dysfunction, mood disturbance, anatomical, structural and functional brain network disruptions are present at the early stages of epilepsy and may be predictive of clinical course. Although there has been limited research examining these factors and their relation to seizure recurrence in the UFS population, preliminary data from the literature and from our research strongly suggest prognostic value of these variables and their utility in a multimodal prediction approach.

## *Aims of this Study*

Our goal is to examine the baseline behavioral and neuroanatomical characteristics of adult patients with UFS and to develop the first multimodal biomarker-based predictive model of seizure recurrence in this population.

We aim:

1. To determine the prevalence and nature of cognitive dysfunction and mood disturbance in adults with UFS, and to determine how these factors differ between those with (UFS-r) and without (UFS-nr) seizure recurrence.
2. To determine changes in structural and functional brain networks (using MRI and EEG) following UFS compared to controls, and in patients with UFS-r and UFS-nr.
3. To develop a multimodal predictive model that combines clinical information with the identified significant biomarkers (from aims 1-2) to predict 12-month risk of seizure recurrence after UFS.

## **Methods and analysis:**

### **Patient Recruitment**

#### ***Research Centres***

We will recruit patients with UFS from two Canadian epilepsy centers that have clinics specifically dedicated to evaluation and treatment of UFS and newly diagnosed epilepsy.

1  
2 The Halifax First Seizure Clinic (HFSC) is part of a comprehensive, academically driven program  
3 providing clinical and counseling services to adult patients (ages 18+) from across Atlantic Canada  
4 (population 2.3 million). Between July and December 2021, HFSC received 654 referrals, with 244  
5 (37%) classified as UFS. Recruitment estimates for this site based on two recent studies are  
6 approximately 40 participants per year with a full-time research coordinator.  
7  
8

9  
10 The Kingston First Seizure Clinic was established as part of the comprehensive services provided through  
11 the provincial government designated District Epilepsy Centre in Kingston and has a catchment area  
12 comprising the whole of South-Eastern Ontario (population 500,000). The clinic assesses over 120  
13 patients per year and is targeted specifically at those with first seizure, with patients with new-onset  
14 epilepsy seen in other clinics.  
15  
16  
17  
18

### 19 20 **Inclusion & Exclusion Criteria**

21  
22 This study will include adult patients with UFS between the ages of 18-65 years. Individuals over the  
23 age of 65 will not be included to reduce the probability of including individuals with early dementia. We  
24 will also exclude individuals who, upon assessment during their first clinic appointment, are determined  
25 to have non-epileptic events, prior seizure events or diagnosis of epilepsy (e.g. based on abnormal CT or  
26 EEG), provoked seizure (e.g. medication, substance misuse, metabolic), acute symptomatic seizures, an  
27 existing prescription for anti-seizure drugs, significant CNS comorbidity that may affect cognition and  
28 brain networks (e.g. progressive neurological disorder, MS), previous neurosurgery, or contraindication  
29 to MRI. We will also include a sample of age, sex, and education-matched healthy controls with the same  
30 exclusion criteria.  
31  
32  
33  
34  
35  
36  
37  
38

### 39 **Sample Size Calculation**

40  
41 A pilot study conducted at the Halifax First Seizure Clinic (P.I. A. Omisade) informs the sample size  
42 calculation for this multi-centre study. The pilot represents the first study examining multi-modal  
43 biomarkers of seizure recurrence following untreated UFS (n=15 to date) and treated new onset epilepsy  
44 (NOE, n=14).  
45  
46  
47

48 Sample size estimates are based on group comparisons between the UFS-r and UFS-nr subgroups. Group  
49 sizes of 55 (UFS-r) and 72 (UFS-nr) are sufficient for cognitive impairment, anxiety/depression, and  
50 resting state fMRI data (see Supplementary Material).  
51  
52

53 For other EEG and MRI-derived network and connectivity measures, we rely on literature. A protocol  
54 for a prospective observational cohort study of seizure recurrence in patients with NDE using these data  
55 as predictors gives an estimate of 72 patients (24 with seizure recurrence, 48 without) and 48 controls  
56  
57  
58  
59

1 using a very stringent significance level of 0.001, power of 90% and effect size estimates based on their  
2 previous studies [42].  
3

4  
5 A sample size of 150 patients with UFS (of whom ~60 will experience a recurrence) and 75 healthy  
6 controls is sufficient to detect changes in all metrics for which we have pilot data and allows up to 12  
7 variables in the predictive model based on the rule-of-thumb  $\sqrt{\text{Sample size}}$  predictors. A further 50  
8 patients (25% of the total) will form an independent replication dataset.  
9  
10  
11

### 12 13 **Planned Study Visits**

14  
15 Patients will be seen in the First Seizure Clinics by a neurologist or nurse-practitioner within 2-4 weeks  
16 of the seizure event (Figure 2). The initial visit will involve a standard clinical assessment, review of  
17 inclusion and exclusion criteria, and, if appropriate, referral for the research study. The informed consent  
18 discussion will be conducted by a research assistant following the clinic visit. Participants will undergo  
19 cognitive screening assessment, MRI imaging and EEG (if not already done) within 2-4 weeks of the  
20 initial clinic visit (Figure 2).  
21  
22  
23  
24  
25

26 Seizure recurrence will be monitored by a diary provided to each participant with instructions to contact  
27 the research team in the event of a seizure. A member of the research team will follow up with participants  
28 by telephone at 3, 6, 9 and 12 months following the initial seizure. The primary outcome will be seizure  
29 recurrence at 12 months.  
30  
31  
32

33 Healthy control participants will complete the same neuropsychological battery, MRI scans and EEG  
34 protocols to evaluate baseline level of impairment in a healthy population, and for the group comparisons  
35 of UFS.  
36  
37  
38

### 39 **Clinical Variables**

40  
41 The following information will be documented at the time of the initial First Seizure clinic visit: age, sex,  
42 gender, time between seizure and clinic visit (in days), first seizure arising from sleep (yes/no), co-morbid  
43 neurological or psychiatric conditions (yes/no), substance use (yes/no and types of substances),  
44 medications and abnormal findings on neuroimaging (yes/no) if completed prior to the clinic visit.  
45  
46  
47  
48

### 49 **Neuropsychological Assessment Procedures**

50  
51 The cognitive screening battery is detailed in Table 1. Participants will complete mood questionnaires at  
52 the same time using the Hospital Anxiety and Depression Scale (HADS) [43], which generates separate  
53 scores for symptoms of depression and anxiety.  
54  
55  
56  
57  
58  
59  
60



**Table 1: Neuropsychological test battery**

| Cognitive Domain               | Tests/Scores                                                                                                                   |
|--------------------------------|--------------------------------------------------------------------------------------------------------------------------------|
| General intelligence (IQ)      | WASI-II Vocabulary and Matrix Reasoning Sub-Scales                                                                             |
| Attention and working memory   | WMS-IV Digit Span Total Score<br>WMS-IV Symbol Span Total Score                                                                |
| Processing speed               | Symbol Digit Modalities Test - Oral<br>Trails A - Oral                                                                         |
| Executive function             | DKEFS Verbal Fluency – Switching Subtest<br>DKEFS Color-Word Interference – Interference Subtest<br>Trails B - Oral            |
| Memory                         | Rey Auditory Verbal Learning Test (Immediate Recall Trial 5, Long Delay Free Recall)<br>Aggie Figural Learning Test (as above) |
| Language                       | WASI-II Vocabulary<br>DKEFS Verbal Fluency (Letter, Semantic)<br>Boston Naming Test                                            |
| Visuospatial/visuoconstruction | WASI-II Matrix Reasoning<br>Taylor Complex Figure Copy                                                                         |

*IQ: Intelligence quotient, WASI-II: Wechsler Abbreviated Scale of Intelligence 2<sup>nd</sup> edition [44], WMS-III: Wechsler Memory Scales 3<sup>rd</sup> edition [45], Symbol Digit Modalities Test [46], Trails A & B: Trail Making Test [47], DKEFS: Delis-Kaplan Executive Function Scales [48], Rey Auditory Verbal Learning Test [49], Aggie Figural Fluency [50], Boston Naming Test [51], Taylor Complex Figure Copy [52].*

## Neuroimaging Protocol

Neuroimaging in Kingston will take place on the 3T Siemens Magnetom Prisma Fit scanner located in the Centre for Neuroscience Studies at Queen's University. The protocol employs sequences adapted from the Human Connectome Project (<http://www.humanconnectomeproject.org/>) and diffusion-imaging is based on recommendations from DSI Studio (<http://dsi-studio.labsolver.org/Manual/b-table-for-qbi-dsi-and-gqi-scans>). The established protocol includes the following acquisitions:

- Structural scans including a 3D T1-weighted MPRAGE (0.8mm isotropic, 7 minutes), 3D T2-weighted SPACE (0.8mm isotropic, 6 minutes) and a T2-weighted FLAIR scan (1mm, 6 minutes); a 2D T2-weighted sequence with high in-plane resolution will be added to enable hippocampal assessments and in accordance with the HARNESS protocol [53]
- Resting state functional MRI (2mm isotropic, 8x Multiband, 800ms temporal resolution, acquired in 2 phase-encoding directions with additional field map, 15 minutes)
- Diffusion-weighted imaging (1.5mm isotropic, 4x Multiband, acquired with 185 diffusion-weighting directions over 2 shells in opposite phase encoding directions (98 directions in AP and 99 directions in PA), maximum b-value of 3000 s/mm<sup>2</sup>, with a reverse phase-encode non-diffusion weighted scan for distortion correction, 12 minutes).

A harmonised sequence will be implemented on the 3T GE MR750 scanner located in Halifax with a 32-channel Nova Medical coil and be validated with two human volunteers scanned at both sites. Image quality will be assessed using MRIQC ([poldracklab.github.io/mriqc/](http://poldracklab.github.io/mriqc/)). Any biases in quantitative metrics between the two sites will be corrected using ComBat, an algorithm first described in genomics that derives a batch-specific transformation to express all data in a common space removing any batch effects using an empirical Bayes framework [54]. In this case, the “batches” are the two centres. This approach has been validated in neuroimaging studies [55, 56] and used in prior multicentre epilepsy neuroimaging studies as part of the ENIGMA Consortium [57].

## EEG Protocol

A routine EEG will be acquired using standard electrode placement according to the 10-20 International System and a sampling rate of at least 500Hz and recorded for 30 minutes including hyperventilation and photic stimulation as standard activation procedures (assuming no contraindication). In Kingston, all EEG recordings will take place in Kingston Health Sciences Centre prior to the clinical assessment and in Halifax, they will take place 2-4 weeks following the initial clinic visit at the QEII Health Sciences

Centre (as per local policies). If patients had completed an EEG elsewhere in Nova Scotia prior to the clinic visit, the EEG will be read by the epileptologists in Halifax.

## Data Analysis

### *Primary Outcome*

The primary outcome is seizure recurrence by 12 months. Participants will form 3 groups: healthy controls, participants with UFS and no seizure recurrence by 12 months (UFS-nr) and those with UFS and seizure recurrence (UFS-r). Initial analyses will compare all participants with UFS to healthy controls to determine baseline differences. Subsequent analyses will compare the UFS-nr and UFS-r cohorts to identify discriminatory variables for the multimodal predictive model.

### *Neuropsychology*

Individual assessments will be scored using published demographically corrected norms to produce individual standard scores for each task that will be converted to Z-scores. Both individual domain-specific and global Z-scores (i.e., average Z-score across entire battery) will be used for further analyses.

### *Neuroimaging*

Neuroimaging data will be stored using the BIDS (Brain Imaging Data Structure) specification [58] to facilitate subsequent processing.

Anatomical MRI comprising T1-weighted images will be processed with FreeSurfer to yield volumes of key structures, such as the thalamus, and maps of cortical thickness. Group comparisons will be performed as documented above to identify key changes.

Functional MRI will be preprocessed using fMRIPrep [59] and the brain will be parcellated into regions using the Desikan-Killiany atlas in FreeSurfer. Matrices of functional connectivity will be determined using fractional Amplitude of Low Frequency Fluctuations (fALFF) in different frequency bands. Network metrics such as clustering coefficient, characteristic path length and small-worldness [60] will be derived from the resulting connectivity graphs using Brain Connectivity Toolbox (<https://sites.google.com/site/bctnet/>) and compared between groups. Secondary analyses will include seed-to-voxel analyses of specific cognitive networks, such as the default mode network [35].

Diffusion-weighted MRI will be preprocessed with QSIprep (<https://qsiprep.readthedocs.io>) and tractography will be used to generate matrices of structural connectivity. The connectivity matrices will be analysed with Brain Connectivity Toolbox and network metrics compared between groups. Key metrics will include characteristic path length, small-worldness and global efficiency [33].

1  
2 The functional and structural connectomes will also be analysed with Network-Based Statistics (NBS),  
3 a toolbox to robustly identify which parts of the connectome differ between groups and to identify  
4 potential factors to include in the machine-learning based multimodal prognostication model [34].  
5  
6

### 7 8 ***Electroencephalography*** 9

10 EEG data will be anonymized and exported from the hospital system and subsequently imported into  
11 EEGLAB (<https://sccn.ucsd.edu/eeglab/index.php>). Standard automated preprocessing will be used to  
12 remove artifacts [61] and the EEG will be converted to an average reference montage, excluding the  
13 channels that commonly contain artefact (e.g., eye blinking artefact in Fp1/Fp2). Using artefact-free  
14 epochs of EEG data, a band-pass filter will be used to split the data into commonly used frequency bands  
15 including delta (2-4Hz), theta (4-8Hz), lower alpha (8-10.5Hz), upper alpha (10.5-13Hz), lower beta (13-  
16 20Hz), higher beta (20-30Hz) and gamma (30-45Hz). For each frequency band, functional connectivity  
17 will be assessed between each channel using Phase Lag Index [62], coherence and synchronisation  
18 likelihood [63] and subsequently averaged across each channel. Group comparisons will be performed  
19 to identify potential factors for the prognostication model.  
20  
21  
22  
23  
24  
25  
26  
27

### 28 **Predictive Model** 29

30 We will build a multivariate prediction model for seizure recurrence using binomial logistic regression  
31 with L2 regularisation to avoid overfitting.  
32

33 Quantitative metrics derived from each modality will comprise the potential feature set (Figure 3), and  
34 the output will be the predicted probability of seizure recurrence within 12 months. Only features  
35 demonstrating the most significant differences between groups with and without seizure recurrence and  
36 lacking significant correlation with other such features (Pearson's  $r < 0.7$ ) will be retained aiming for a  
37 maximum of 12 features in the final model (based on the rule-of-thumb of  $\sqrt{\text{Sample}}$  features).  
38  
39  
40  
41  
42

43 For validation, we will apply stratified 10-fold cross validation, with inner folds used for model building  
44 and hyper-parameter tuning through grid search and outer folds used for unbiased test sets. Performance  
45 will be assessed using the Area Under the Receiver Operating Characteristics curve (AUC). Sensitivity,  
46 specificity, positive and negative predictive values will also be determined. After building our model, we  
47 will perform an independent validation using 50 subjects (25%) never included in model building.  
48  
49  
50  
51

### 52 **Timeline** 53

54 This study will be conducted over a 5-year period beginning in August 2023. Following setup and  
55 harmonization, data collection will occur over 30 months ending July 2026 with a further 12 months of  
56  
57  
58  
59  
60

1 follow up. Data analysis and knowledge translation will start when 12-month follow-up data become  
2 available.  
3  
4

### 6 **Comparison to Other Studies**

8 A recent protocol seeks to investigate seizure recurrence after UFS in 100 participants in the UK, with  
9 the majority having conventional MRI studies and only a minority undergoing advanced MRI sequences  
10 [64]. Whilst serum biomarkers are also included, we instead include a comprehensive  
11 neuropsychological assessment. Further, we include a control population for comparison and a larger  
12 sample size to enable the development of a predictive model.  
13  
14  
15

17 A second study (SWISS FIRST) in Switzerland is prospectively recruiting patients presenting with a  
18 possible first seizure in Switzerland, and thus does not have the same rigorous exclusion criteria to ensure  
19 that only those with UFS as diagnosed by a neurologist are included [65]. No specific follow-up is  
20 planned outside routine clinical care. Analysis will include morphometry and functional connectivity  
21 from MRI, and spike maps and microstates from EEG to predict recurrence.  
22  
23  
24  
25

### 26 **Patient and Public Involvement**

28 The identification and development of the research questions and outcomes has been informed by close  
29 collaboration with local epilepsy charities. Epilepsy South-Eastern Ontario (Kingston) works closely  
30 with Kingston Health Sciences Centre in providing support and counselling to patients, including those  
31 experiencing their first seizure. The Epilepsy Association of the Maritimes (Halifax) has worked closely  
32 with Nova Scotia Health for 40 years and notes frequent calls from people who have had a first seizure  
33 and are thus wondering if they will have another and if so, when. Both organisations have committed to  
34 disseminate research findings via education sessions, newsletters and social media feeds.  
35  
36  
37  
38  
39  
40

### 41 **Ethics and dissemination:**

#### 42 **Ethical Approval**

44 This study was approved by the Health Sciences and Affiliated Teaching Hospitals Research Ethics  
45 Board at Queen's University (DMED-2681-22) and the Nova Scotia Research Ethics Board (1028519).  
46 It is registered with ClinicalTrials.gov with identifier NCT05724719.  
47  
48  
49  
50

#### 51 **Data Governance and Confidentiality**

52 The Kingston site will store written files, including consent forms and cognitive data, in a locked filing  
53 cabinet accessible only to Dr. Winston. MRI and EEG data will be stored on a secure server in the Centre  
54 for Neuroscience Studies. De-identified study participant ID's will be assigned to make data non-  
55  
56  
57  
58  
59  
60

1  
2 identifiable for data analysis. The master linking log will be securely saved on a password-protected  
3 server in the Centre for Neuroscience Studies at Queen's University, separate from the Data  
4 Collection/Capture Sheet. De-identified data will be stored electronically on a secure password protected  
5 server in the Centre for Neuroscience Studies and in a web-based database hosted by the Faculty of  
6 Health Sciences (RedCap).  
7  
8  
9

10 The Halifax site will enter de-identified data directly on the Kingston based RedCap, and Halifax will  
11 have a separate linking log/database for identifiable data elements held locally. Data transferred to  
12 another site will be de-identified, transferred with SFTP, and encrypted. All data transfer will be covered  
13 by a data transfer agreement to/from Halifax.  
14  
15  
16  
17

18 After the storage period of 5 years beyond the end of the study, de-identified data will be archived  
19 indefinitely in the Queen's University's Institutional Repository as per the Canadian Institutes of Health  
20 Research requirements and Queens' University Policy. Confidentiality will be protected to the extent  
21 permitted by applicable laws.  
22  
23  
24  
25

### 26 **Dissemination**

27  
28 We will present results in peer-reviewed journals and at epilepsy-related national and international  
29 conferences (e.g. American Epilepsy Society, Canadian League Against Epilepsy, International Epilepsy  
30 Congress) and local events.  
31  
32

33 Findings will be presented to people with epilepsy and lay audience members in the Epilepsy Association  
34 of the Maritimes newsletter, via Epilepsy South-Eastern Ontario and supported with relevant talks via  
35 these patient support organizations.  
36  
37  
38  
39

### 40 **Data Set**

41 All code and algorithms will be made available as open source on repositories such as Github.  
42  
43  
44  
45  
46  
47  
48  
49  
50  
51  
52  
53  
54  
55  
56  
57  
58  
59  
60

1  
2 **Author's contributions:** The initial draft of the protocol was jointly developed by GPW and AO. KB,  
3 LBL, DB, JG, KI, MS, GS, BW, and SW reviewed and provided feedback on the protocol. BB and KBG  
4 performed a literature search to update the protocol following funding, and BB prepared the protocol for  
5 submission.  
6  
7

8  
9 **Funding statement:** This work was supported by the Canadian Institutes of Health Research (CIHR)  
10 grant number PJT-183906.  
11

12 **Competing interests statement:** None declared.  
13  
14  
15  
16  
17  
18  
19  
20  
21  
22  
23  
24  
25  
26  
27  
28  
29  
30  
31  
32  
33  
34  
35  
36  
37  
38  
39  
40  
41  
42  
43  
44  
45  
46  
47  
48  
49  
50  
51  
52  
53  
54  
55  
56  
57  
58  
59  
60

## References

1. Fisher, R.S., et al., Epileptic seizures and epilepsy: definitions proposed by the International League Against Epilepsy (ILAE) and the International Bureau for Epilepsy (IBE). *Epilepsia*, 2005. **46**(4): p. 470-2.
2. Fisher, R.S., et al., *ILAE official report: a practical clinical definition of epilepsy*. *Epilepsia*, 2014. **55**(4): p. 475-82.
3. Annegers, J.F., et al., *Incidence of acute symptomatic seizures in Rochester, Minnesota, 1935-1984*. *Epilepsia*, 1995. **36**(4): p. 327-33.
4. Hauser, W.A., J.F. Annegers, and L.T. Kurland, *Incidence of epilepsy and unprovoked seizures in Rochester, Minnesota: 1935-1984*. *Epilepsia*, 1993. **34**(3): p. 453-68.
5. Berg, A.T., *Risk of recurrence after a first unprovoked seizure*. *Epilepsia*, 2008. **49 Suppl 1**: p. 13-8.
6. Berg, A.T. and S. Shinnar, *The risk of seizure recurrence following a first unprovoked seizure: a quantitative review*. *Neurology*, 1991. **41**(7): p. 965-72.
7. Krumholz, A., et al., *Evidence-based guideline: Management of an unprovoked first seizure in adults: Report of the Guideline Development Subcommittee of the American Academy of Neurology and the American Epilepsy Society*. *Neurology*, 2015. **84**(16): p. 1705-13.
8. Crocker, C.E., B. Pohlmann-Eden, and M.H. Schmidt, *Role of neuroimaging in first seizure diagnosis*. *Seizure*, 2017. **49**: p. 74-78.
9. Rizvi, S., et al., *Epidemiology of early stages of epilepsy: Risk of seizure recurrence after a first seizure*. *Seizure*, 2017. **49**: p. 46-53.
10. Foster, E., et al., *First seizure presentations in adults: beyond assessment and treatment*. *J Neurol Neurosurg Psychiatry*, 2019. **90**(9): p. 1039-1045.
11. Bernhardt, B.C., L. Bonilha, and D.W. Gross, *Network analysis for a network disorder: The emerging role of graph theory in the study of epilepsy*. *Epilepsy Behav*, 2015. **50**: p. 162-70.
12. Richardson, M.P., *Large scale brain models of epilepsy: dynamics meets connectomics*. *J Neurol Neurosurg Psychiatry*, 2012. **83**(12): p. 1238-48.
13. Hermann, B.P., et al., *Cognitive prognosis in chronic temporal lobe epilepsy*. *Ann Neurol*, 2006. **60**(1): p. 80-7.
14. Pohlmann-Eden, B., et al., *The relevance of neuropsychiatric symptoms and cognitive problems in new-onset epilepsy - Current knowledge and understanding*. *Epilepsy Behav*, 2015. **51**: p. 199-209.



15. Eddy, C.M., H.E. Rickards, and A.E. Cavanna, *The cognitive impact of antiepileptic drugs*. *Ther Adv Neurol Disord*, 2011. **4**(6): p. 385-407.
16. Helmstaedter, C., et al., *Disentangling the relationship between epilepsy and its behavioral comorbidities - the need for prospective studies in new-onset epilepsies*. *Epilepsy Behav*, 2014. **31**: p. 43-7.
17. Witt, J.A. and C. Helmstaedter, *Should cognition be screened in new-onset epilepsies? A study in 247 untreated patients*. *J Neurol*, 2012. **259**(8): p. 1727-31.
18. Jackson-Tarlton, C.S., et al., *A prospective pilot study of cognitive impairment and mood in adults with first seizure, new-onset epilepsy, and newly diagnosed epilepsy at time of initial seizure presentation*. *Epilepsy Behav*, 2020. **112**: p. 107359.
19. Scott, A.J., et al., *How frequently is anxiety and depression identified and treated in hospital and community samples of adults with epilepsy?* *Epilepsy Behav*, 2021. **115**: p. 107703.
20. Gurgu, R.S., et al., *Psychiatric comorbidities in adult patients with epilepsy (A systematic review)*. *Exp Ther Med*, 2021. **22**(2): p. 909.
21. Thapar, A., M. Kerr, and G. Harold, *Stress, anxiety, depression, and epilepsy: investigating the relationship between psychological factors and seizures*. *Epilepsy Behav*, 2009. **14**(1): p. 134-40.
22. Lane, C., et al., *Anxiety and Depression in Adult First Seizure Presentations*. *Can J Neurol Sci*, 2018. **45**(2): p. 144-149.
23. Hesdorffer, D.C., et al., *Depression and suicide attempt as risk factors for incident unprovoked seizures*. *Ann Neurol*, 2006. **59**(1): p. 35-41.
24. Baldin, E., et al., *Stress is associated with an increased risk of recurrent seizures in adults*. *Epilepsia*, 2017. **58**(6): p. 1037-1046.
25. Whelan, C.D., et al., *Structural brain abnormalities in the common epilepsies assessed in a worldwide ENIGMA study*. *Brain*, 2018. **141**(2): p. 391-408.
26. Perani, S., et al., *Thalamic volume reduction in drug-naive patients with new-onset genetic generalized epilepsy*. *Epilepsia*, 2018. **59**(1): p. 226-234.
27. Leek, N.J., et al., *Thalamohippocampal atrophy in focal epilepsy of unknown cause at the time of diagnosis*. *Eur J Neurol*, 2021. **28**(2): p. 367-376.
28. Bernhardt, B.C., et al., *Mapping thalamocortical network pathology in temporal lobe epilepsy*. *Neurology*, 2012. **78**(2): p. 129-36.
29. McGill, M.L., et al., *Functional neuroimaging abnormalities in idiopathic generalized epilepsy*. *Neuroimage Clin*, 2014. **6**: p. 455-62.

- 1
- 2 30. Schmidt, M.H., et al., *Toward individualized prediction of seizure recurrence: Hippocampal*
- 3 *neuroimaging features in a cohort of patients from a first seizure clinic.* *Epilepsy Behav*, 2021.
- 4 **122**: p. 108118.
- 5
- 6
- 7 31. Bullmore, E. and O. Sporns, *Complex brain networks: graph theoretical analysis of structural*
- 8 *and functional systems.* *Nat Rev Neurosci*, 2009. **10**(3): p. 186-98.
- 9
- 10 32. Vaughan, D.N., et al., *MRI-negative temporal lobe epilepsy: A network disorder of neocortical*
- 11 *connectivity.* *Neurology*, 2016. **87**(18): p. 1934-1942.
- 12
- 13
- 14 33. Park, K.M., et al., *Progressive topological disorganization of brain network in focal epilepsy.*
- 15 *Acta Neurol Scand*, 2018. **137**(4): p. 425-431.
- 16
- 17 34. Kreilkamp, B.A.K., et al., *Altered structural connectome in non-lesional newly diagnosed focal*
- 18 *epilepsy: Relation to pharmacoresistance.* *Neuroimage Clin*, 2021. **29**: p. 102564.
- 19
- 20 35. Alonazi, B.K., et al., *Resting-state functional brain networks in adults with a new diagnosis of*
- 21 *focal epilepsy.* *Brain Behav*, 2019. **9**(1): p. e01168.
- 22
- 23
- 24 36. Gupta, L., et al., *Towards prognostic biomarkers from BOLD fluctuations to differentiate a first*
- 25 *epileptic seizure from new-onset epilepsy.* *Epilepsia*, 2017. **58**(3): p. 476-483.
- 26
- 27 37. van Diessen, E., et al., *Improved diagnosis in children with partial epilepsy using a multivariable*
- 28 *prediction model based on EEG network characteristics.* *PLoS One*, 2013. **8**(4): p. e59764.
- 29
- 30 38. Koo, G.E., et al., *Is Functional Connectivity after a First Unprovoked Seizure Different Based on*
- 31 *Subsequent Seizures and Future Diagnosis of Epilepsy?* *J Epilepsy Res*, 2022. **12**(2): p. 62-67.
- 32
- 33 39. Douw, L., et al., *'Functional connectivity' is a sensitive predictor of epilepsy diagnosis after the*
- 34 *first seizure.* *PLoS One*, 2010. **5**(5): p. e10839.
- 35
- 36 40. Matos, J., et al., *Diagnosis of Epilepsy with Functional Connectivity in EEG after a Suspected*
- 37 *First Seizure.* *Bioengineering (Basel)*, 2022. **9**(11).
- 38
- 39 41. Drenthen, G.S., et al., *Predictive value of functional MRI and EEG in epilepsy diagnosis after a*
- 40 *first seizure.* *Epilepsy Behav*, 2021. **115**: p. 107651.
- 41
- 42 42. de Bezenac, C., et al., *Investigating imaging network markers of cognitive dysfunction and*
- 43 *pharmacoresistance in newly diagnosed epilepsy: a protocol for an observational cohort study*
- 44 *in the UK.* *BMJ Open*, 2019. **9**(10): p. e034347.
- 45
- 46 43. Snaith, R.P., *The Hospital Anxiety And Depression Scale.* *Health Qual Life Outcomes*, 2003. **1**:
- 47 p. 29.
- 48
- 49 44. Wechsler, D., *WASI II: Wechsler Abbreviated Scale of Intelligence.* 2nd ed. 2011, Texas: Pearson.
- 50 45. Wechsler, D., *Wechsler Memory Scale. 3rd ed (WMS-III). Technical and Interpretive Manual.*
- 51 2003, Texas: Pearson.
- 52
- 53
- 54
- 55
- 56
- 57
- 58
- 59

- 1
- 2 46. Smith, A., *Symbol digit modalities test: SDMT*. 2000, California: Testzentrale.
- 3
- 4 47. Heaton, R.K., et al., *Revised Comprehensive Norms for an Expanded Halstead-Reitan Battery: Demographically Adjusted Neuropsychological Norms for African American and Caucasian*
- 5 *Adults*. 2004, Lutz, Florida: Psychological Assessment Resources, Inc.
- 6
- 7
- 8
- 9 48. Delis, D.C., E. Kaplan, and J.H. Kramer, *Delis-Kaplan Executive Function System (DKEFS)*.
- 10 2001, San Antonio, Texas: Pearson.
- 11
- 12 49. Schmidt, M., *Rey Auditory and Verbal Learning Test. A handbook*. 1996, California: Western
- 13 Psychological Association.
- 14
- 15 50. Majdan, A., V. Sziklas, and M. Jones-Gotman, *Performance of healthy subjects and patients with*
- 16 *resection from the anterior temporal lobe on matched tests of verbal and visuoperceptual*
- 17 *learning*. *J Clin Exp Neuropsychol*, 1996. **18**(3): p. 416-30.
- 18
- 19
- 20
- 21 51. Goodglass, H., E. Kaplan, and S. Weintraub, *Boston Naming Test*. 1983, Pennsylvania: Lea &
- 22 Febinger.
- 23
- 24 52. Taylor, L.B., *Localisation of cerebral lesions by psychological testing*. *Clin Neurosurg*, 1969. **16**:
- 25 p. 269-87.
- 26
- 27
- 28 53. Wang, I., et al., *MRI essentials in epileptology: a review from the ILAE Imaging Taskforce*.
- 29 *Epileptic Disord*, 2020. **22**(4): p. 421-437.
- 30
- 31 54. Johnson, W.E., C. Li, and A. Rabinovic, *Adjusting batch effects in microarray expression data*
- 32 *using empirical Bayes methods*. *Biostatistics*, 2007. **8**(1): p. 118-27.
- 33
- 34
- 35 55. Fortin, J.P., et al., *Harmonization of multi-site diffusion tensor imaging data*. *Neuroimage*, 2017.
- 36 **161**: p. 149-170.
- 37
- 38 56. Yu, M., et al., *Statistical harmonization corrects site effects in functional connectivity*
- 39 *measurements from multi-site fMRI data*. *Hum Brain Mapp*, 2018. **39**(11): p. 4213-4227.
- 40
- 41 57. Sisodiya, S.M., et al., *The ENIGMA-Epilepsy working group: Mapping disease from large data*
- 42 *sets*. *Hum Brain Mapp*, 2020.
- 43
- 44
- 45 58. Gorgolewski, K.J., et al., *The brain imaging data structure, a format for organizing and*
- 46 *describing outputs of neuroimaging experiments*. *Sci Data*, 2016. **3**: p. 160044.
- 47
- 48 59. Esteban, O., et al., *fMRIPrep: a robust preprocessing pipeline for functional MRI*. *Nat Methods*,
- 49 2019. **16**(1): p. 111-116.
- 50
- 51 60. Rubinov, M. and O. Sporns, *Complex network measures of brain connectivity: uses and*
- 52 *interpretations*. *Neuroimage*, 2010. **52**(3): p. 1059-69.
- 53
- 54 61. Pedroni, A., A. Bahreini, and N. Langer, *Automagic: Standardized preprocessing of big EEG*
- 55 *data*. *Neuroimage*, 2019. **200**: p. 460-473.
- 56
- 57
- 58
- 59
- 60

- 1  
2 62. Stam, C.J., G. Nolte, and A. Daffertshofer, *Phase lag index: assessment of functional connectivity*  
3 *from multi channel EEG and MEG with diminished bias from common sources*. Hum Brain Mapp,  
4 2007. **28**(11): p. 1178-93.  
5  
6  
7 63. Stam, C.J. and B.W. van Dijk, *Synchronization likelihood: an unbiased measure of generalized*  
8 *synchronization in multivariate data sets*. Physica D, 2002. **163**(3): p. 236-251.  
9  
10 64. Adan, G.H., et al., *Protocol for an observational cohort study investigating biomarkers predicting*  
11 *seizure recurrence following a first unprovoked seizure in adults*. BMJ Open, 2022. **12**(12): p.  
12 e065390.  
13  
14  
15 65. Jin, B.Z., et al., *Diagnosis of epilepsy after first seizure. Introducing the SWISS FIRST study*.  
16 Clinical and Translational Neuroscience, 2020. **4**(2): p. 2514183X20939448.  
17  
18  
19  
20  
21  
22  
23  
24  
25  
26  
27  
28  
29  
30  
31  
32  
33  
34  
35  
36  
37  
38  
39  
40  
41  
42  
43  
44  
45  
46  
47  
48  
49  
50  
51  
52  
53  
54  
55  
56  
57  
58  
59  
60

1  
2 **Figures**

3  
4 *Figure 1: Progression from UFS to epilepsy*  
5  
6  
7  
8  
9  
10  
11  
12  
13  
14  
15  
16  
17  
18  
19  
20  
21  
22  
23  
24  
25  
26  
27  
28  
29  
30  
31  
32  
33  
34  
35  
36  
37  
38  
39  
40  
41  
42  
43  
44  
45  
46  
47  
48  
49  
50  
51  
52  
53  
54  
55  
56  
57  
58  
59  
60

For peer review only

1  
2  
3  
4  
5  
6  
7  
8  
9  
10  
11  
12  
13  
14  
15  
16  
17  
18  
19  
20  
21  
22  
23  
24  
25  
26  
27  
28  
29  
30  
31  
32  
33  
34  
35  
36  
37  
38  
39  
40  
41  
42  
43  
44  
45  
46  
47  
48  
49  
50  
51  
52  
53  
54  
55  
56  
57  
58  
59  
60

*Figure 2: Individual patient study participation timeline*

For peer review only

1  
2 **Figure 3: Modelling approach** (*fALFF* = fractional amplitude of low frequency fluctuations, *PLI* =  
3 phase lag index, *SL* = synchronisation likelihood)  
4  
5  
6  
7  
8  
9  
10  
11  
12  
13  
14  
15  
16  
17  
18  
19  
20  
21  
22  
23  
24  
25  
26  
27  
28  
29  
30  
31  
32  
33  
34  
35  
36  
37  
38  
39  
40  
41  
42  
43  
44  
45  
46  
47  
48  
49  
50  
51  
52  
53  
54  
55  
56  
57  
58  
59  
60

For peer review only

1  
2  
3  
4  
5  
6  
7  
8  
9  
10  
11  
12  
13  
14  
15  
16  
17  
18  
19  
20  
21  
22  
23  
24  
25  
26  
27  
28  
29  
30  
31  
32  
33  
34  
35  
36  
37  
38  
39  
40  
41  
42  
43  
44  
45  
46  
47  
48  
49  
50  
51  
52  
53  
54  
55  
56  
57  
58  
59  
60



Figure 1: Progression from UFS to epilepsy

58x11mm (300 x 300 DPI)



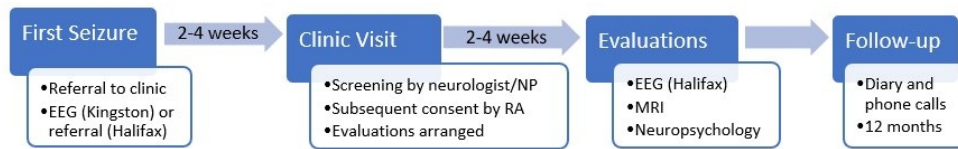

Figure 2: Individual patient study participation timeline

75x12mm (300 x 300 DPI)

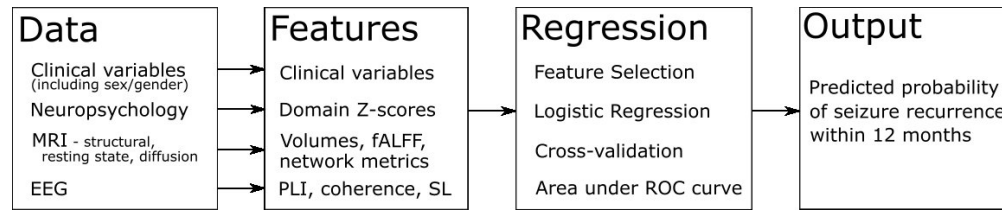

Figure 3: Modelling approach (fALFF = fractional amplitude of low frequency fluctuations, PLI = phase lag index, SL = synchronisation likelihood)

97x19mm (300 x 300 DPI)

## **Supplementary Material**

### **Sample Size Calculation**

Cognitive impairment (at least one Z-score in the impaired range  $\leq -1.5$ , 7th percentile) was present in 73% of UFS patients. Global Z-scores across cognitive tasks in UFS-r patients demonstrated mild but significantly greater cognitive dysfunction (n=4, mean -0.51, std 0.7) than patients in the UFS-nr group (n=8, mean 0.11, std 0.4) (t=2.14, p<0.05, d=0.69; Mann-Whitney U=5, p<0.05, r=0.54) (Supplementary Figure 1). The required sample size (significance 0.05, 80% power) is 55 participants per group.

Clinically significant symptoms of anxiety and depression (scores above clinical cutoffs on the GAD-7 and NDDI-E questionnaires) were observed in 50% and 58% of all UFS patients. In the UFS-r group, the scores fell in the clinically significant range in 50% and 75% of patients respectively. In the UFS-nr group, the rates of clinically significant scores were both 50%. To detect differences on the depression scale between the two UFS groups in the proposed study, the required sample sizes (significance 0.05, 80% power) are n=72 for the non-recurrence group and n=48 for the recurrence group.

rsfMRI analyses were performed on all UFS patients with MRI data (n=8) and age-matched controls (n=8) as comparison of UFS-r and UFS-nr was not possible due to missing MRI data. Global efficiency of the DMN differed between groups at p<0.05 with an effect size of d=0.89. With respect to specific DMN nodes, the left posterior cingulate betweenness centrality differed between groups at p<0.05 with an effect size of d=0.74. Based on these effect sizes, the required sample size (for significance 0.05, 80% power) were estimated at 15 and 51 participants per group, respectively.

1  
2  
3  
4  
5  
6  
7  
8  
9  
10  
11  
12  
13  
14  
15  
16  
17  
18  
19  
20  
21  
22  
23  
24  
25  
26  
27  
28  
29  
30  
31  
32  
33  
34  
35  
36  
37  
38  
39  
40  
41  
42  
43  
44  
45  
46  
47  
48  
49  
50  
51  
52  
53  
54  
55  
56  
57  
58  
59  
60

*Supplementary Figure 1: Cognitive performance in UFS-r, UFS-nr*

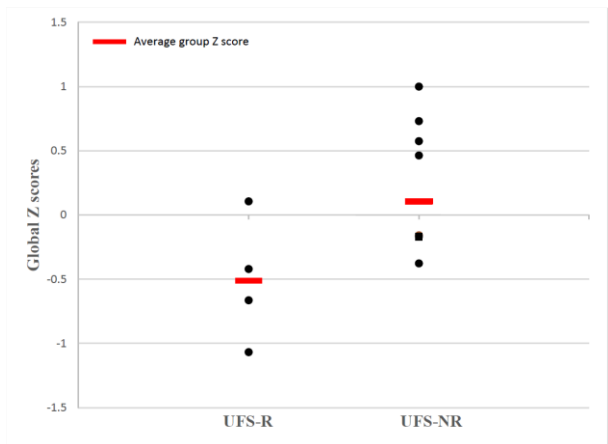

For peer review only
