# Supplementary material for: Literature review and protocol for a prospective multicentre cohort study on multimodal prediction of seizure recurrence after unprovoked first seizure
Source: PubMed Central journal article supplement — BMJ Open. 2024 Apr 5;14(4):e086153. doi: 10.1136/bmjopen-2024-086153 (PMC11002401; doi:10.1136/bmjopen-2024-086153), 2024-04-05
Supplement: bmjopen-2024-086153.reviewer_comments.pdf [file bmjopen-2024-086153.reviewer_comments.pdf]

## PEER REVIEW HISTORY

BMJ Open publishes all reviews undertaken for accepted manuscripts. Reviewers are asked to complete a checklist review form (<http://bmjopen.bmj.com/site/about/resources/checklist.pdf>) and are provided with free text boxes to elaborate on their assessment. These free text comments are reproduced below.

## ARTICLE DETAILS

|                            |                                                                                                                                                                                                                                               |
|----------------------------|-----------------------------------------------------------------------------------------------------------------------------------------------------------------------------------------------------------------------------------------------|
| <b>TITLE (PROVISIONAL)</b> | Literature review and protocol for a prospective multi-centre cohort study on multimodal prediction of seizure recurrence after unprovoked first seizure                                                                                      |
| <b>AUTHORS</b>             | Beattie, Brooke; Batista García-Ramó, Karla; Biggs, Krista; Boissé Lomax, Lysa; Brien, Donald; Gallivan, Jason; Ikeda, Kristin; Schmidt, Matthias; Shukla, Garima; Whatley, Benjamin; Woodroffe, Stephanie; Omisade, Antonina; Winston, Gavin |

This article was not externally reviewed at BMJ Open. Protocols that have been independently assessed prior to submission to BMJ Open are usually fast-tracked to publication on the grounds that further substantial changes will not be possible. This independent assessment will usually be external, independent review for both a substantial grant award from a non-commercial or government funder and ethics approval.
