# Supplementary material for: Literature review and protocol for a prospective multicentre cohort study on multimodal prediction of seizure recurrence after unprovoked first seizure
Source: PubMed Central journal article supplement — BMJ Open. 2024 Apr 5;14(4):e086153. doi: 10.1136/bmjopen-2024-086153 (PMC11002401; doi:10.1136/bmjopen-2024-086153), 2024-04-05

## **Supplementary Material**

### **Sample Size Calculation**

Cognitive impairment (at least one Z-score in the impaired range  $\leq -1.5$ , 7th percentile) was present in 73% of UFS patients. Global Z-scores across cognitive tasks in UFS-r patients demonstrated mild but significantly greater cognitive dysfunction (n=4, mean -0.51, std 0.7) than patients in the UFS-nr group (n=8, mean 0.11, std 0.4) (t=2.14, p<0.05, d=0.69; Mann-Whitney U=5, p<0.05, r=0.54) (Supplementary Figure 1). The required sample size (significance 0.05, 80% power) is 55 participants per group.

Clinically significant symptoms of anxiety and depression (scores above clinical cutoffs on the GAD-7 and NDDI-E questionnaires) were observed in 50% and 58% of all UFS patients. In the UFS-r group, the scores fell in the clinically significant range in 50% and 75% of patients respectively. In the UFS-nr group, the rates of clinically significant scores were both 50%. To detect differences on the depression scale between the two UFS groups in the proposed study, the required sample sizes (significance 0.05, 80% power) are n=72 for the non-recurrence group and n=48 for the recurrence group.

rsfMRI analyses were performed on all UFS patients with MRI data (n=8) and age-matched controls (n=8) as comparison of UFS-r and UFS-nr was not possible due to missing MRI data. Global efficiency of the DMN differed between groups at p<0.05 with an effect size of d=0.89. With respect to specific DMN nodes, the left posterior cingulate betweenness centrality differed between groups at p<0.05 with an effect size of d=0.74. Based on these effect sizes, the required sample size (for significance 0.05, 80% power) were estimated at 15 and 51 participants per group, respectively.

**Supplementary Figure 1: Cognitive performance in UFS-r, UFS-nr**

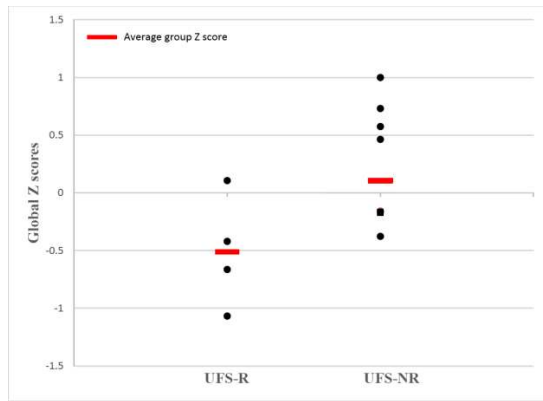

Supplement: bmjopen-2024-086153supp001.pdf [file bmjopen-2024-086153supp001.pdf]
